# Supplementary material for: Circulating Small Noncoding RNAs Have Specific Expression Patterns in Plasma and Extracellular Vesicles in Myelodysplastic Syndromes and Are Predictive of Patient Outcome
Source: PubMed Central journal article supplement (PMC7226126; doi:10.3390/cells9040794), 2020-03-26
Supplement: cells-09-00794-s001.pdf [file cells-09-00794-s001.pdf]

**Circulating small noncoding RNAs have specific patterns in plasma  
and extracellular vesicles in myelodysplastic syndromes and are  
predictive of patient outcome**

Andrea Hrustincova, Zdenek Krejcik, David Kundrat, Katarina Szikszai, Monika Belickova,  
Pavla Pecherkova, Jiri Klema, Jitka Vesela, Monika Hrubá, Jaroslav Cermak, Tereza Hrdinova,  
Matyas Krijt, Jan Valka, Anna Jonasova, Michaela Dostalova Merkerova

**SUPPLEMENTARY INFORMATION**

## SUPPLEMENTARY TABLES AND FIGURES

**SI 1. Characteristics of the sequencing cohort.** The data are presented as the mean and range for all continuous variables. n.a. - not analyzed.

|                                                                     |                  |
|---------------------------------------------------------------------|------------------|
| <b>MDS</b>                                                          | <b>31</b>        |
| Age                                                                 | 67 (29–87)       |
| Sex (male/female)                                                   | 20/11            |
| Diagnosis<br>MLD/RS/5q-/EB1/EB2                                     | 5/5/3/5/13       |
| IPSS-R category<br>very low/low/intermediate/high/very high/n.a.    | 3/10/4/6/6/2     |
| Bone marrow blasts (%)                                              | 7.4 (0.4–19.4)   |
| White blood count (x10 <sup>9</sup> /L)                             | 4.3 (1.2–11.9)   |
| Hemoglobin (g/L)                                                    | 100 (72–138)     |
| Neutrophils (x10 <sup>9</sup> /L)                                   | 2.4 (0.1–8.6)    |
| Platelets (x10 <sup>9</sup> /L)                                     | 136 (13–390)     |
| Cytogenetic features                                                |                  |
| normal karyotype                                                    | 13               |
| isolated del(5q)                                                    | 3                |
| complex                                                             | 4                |
| other                                                               | 8                |
| n.a.                                                                | 3                |
| IPSS-R karyotype<br>very good/good/intermediate/poor/very poor/n.a. | 0/18/4/2/4/3     |
| Somatic mutations                                                   |                  |
| No. of analyzed patients                                            | 18 (58%)         |
| No. of mutations per patient: 0/1/2/3/4/5                           | 3/5/6/2/1/1      |
| The most frequent mutations<br>SF3B1/DNMT3A/RUNX1/ASXL1/EZH2/SETBP1 | 5/5/4/3/3/3      |
| Follow-up                                                           |                  |
| mean follow-up (months)                                             | 22 (1–61)        |
| Deceased, number of patients                                        | 19 (61%)         |
| mean time to death (months)                                         | 19 (1–43)        |
| Follow-up treatment with AZA, number of patients                    | 24               |
| No. of responders                                                   | 9                |
| No. of patients with stable disease                                 | 6                |
| No. of patients with progressive disease                            | 9                |
| <b>AML-MRC</b>                                                      | <b>11</b>        |
| Age                                                                 | 69 (58–77)       |
| Sex (male/female)                                                   | 6/5              |
| Bone marrow blasts (%)                                              | 26.0 (20.1–41.0) |
| White blood count (x10 <sup>9</sup> /L)                             | 3.0 (0.8–8.1)    |
| Hemoglobin (g/L)                                                    | 95 (77–127)      |
| Neutrophils (x10 <sup>9</sup> /L)                                   | 1.0 (0.1–3.4)    |
| Platelets (x10 <sup>9</sup> /L)                                     | 116 (24–258)     |
| Cytogenetic features                                                |                  |
| normal karyotype                                                    | 5                |
| isolated del(5q)                                                    | 1                |
| complex                                                             | 1                |

|                       |            |
|-----------------------|------------|
| other                 | 2          |
| n.a.                  | 2          |
| <b>Healthy donors</b> | <b>17</b>  |
| Age                   | 62 (51–73) |
| Sex (male/female)     | 8/9        |

**SI 2.** Characterization of somatic mutations detected in MDS patients. VAF - variant allele frequency, n.d. – not detected, NA – not available.

| ID          | Dg     | Gene          | NAF | DNA change                                                                                   | Protein change           | ID (dbSNP, COSMIC) |
|-------------|--------|---------------|-----|----------------------------------------------------------------------------------------------|--------------------------|--------------------|
| <b>683</b>  | EB2    | <i>JAK2</i>   | 50  | c.1849G>T                                                                                    | p.Val617Phe              | rs147001633        |
|             |        | <i>DNMT3A</i> | 39  | c.2645G>A                                                                                    | p.Arg882His              | rs77375493         |
| <b>775</b>  | EB2    | <i>SF3B1</i>  | 50  | c.1774G>A                                                                                    | p.Glu592Lys              | COSM132936         |
|             |        | <i>RUNX1</i>  | 22  | c.790G>A                                                                                     | p.Gln264Ter              | NA                 |
|             |        | <i>STAG2</i>  | 14  | c.571_572delAT                                                                               | p.Ile191Ter              | NA                 |
|             |        | <i>EZH2</i>   | 13  | c.1310C>T                                                                                    | p.Trp437Ter              | NA                 |
| <b>807</b>  | RS-SLD | n.d.          | -   | -                                                                                            | -                        | -                  |
| <b>820</b>  | MLD    | <i>SETBP1</i> | 30  | c.2602G>A                                                                                    | p.Asp868Asn              | rs267607042        |
|             |        | <i>SRSF2</i>  | 28  | c.284C>G                                                                                     | p.Pro95Arg               | rs751713049        |
| <b>824</b>  | EB1    | <i>MLL</i>    | 12  | c.173_232delCGGC<br>TGTGGCGGCCGCG<br>GCGGCGGCCGCGG<br>GAAGCAGCGGGGC<br>TGGGGTTCCAGGG<br>GGAG | p.Val60_Ala79del         | NA                 |
| <b>865</b>  | MLD    | <i>DNMT3A</i> | 34  | c.1120C>T                                                                                    | p.Gln374Ter              | rs369109129        |
| <b>985</b>  | RS-MLD | <i>SF3B1</i>  | 42  | c.2098A>G                                                                                    | p.Lys700Glu              | rs559063155        |
|             |        | <i>ASXL1</i>  | 32  | c.1934dup                                                                                    | p.Gly646TrpfsTer12       | rs756958159        |
| <b>1028</b> | MLD    | <i>ASXL1</i>  | 5   | c.2757dup                                                                                    | p.Pro920ThrfsTer4        | rs771822198        |
| <b>1152</b> | RS-MLD | <i>DNMT3A</i> | 47  | c.2645G>A                                                                                    | p.Arg882His              | rs147001633        |
|             |        | <i>SF3B1</i>  | 45  | c.1874G>T                                                                                    | p.Arg625Leu              | COSM110695         |
| <b>1333</b> | EB1    | <i>DNMT3A</i> | 26  | c.2266G>A                                                                                    | p.Glu756Lys              | rs1418213272       |
|             |        | <i>SETBP1</i> | 24  | c.2602G>A                                                                                    | p.Asp868Asn              | rs267607042        |
| <b>1422</b> | MLD    | <i>SRSF2</i>  | 50  | c.284C>T                                                                                     | p.Pro95Leu               | rs751713049        |
|             |        | <i>SETBP1</i> | 50  | c.2602G>A                                                                                    | p.Asp868Asn              | rs267607042        |
|             |        | <i>RUNX1</i>  | 49  | c.482T>C                                                                                     | p.Leu161Pro              | COSM444417         |
| <b>1511</b> | 5q-    | n.d.          | -   | -                                                                                            | -                        | -                  |
| <b>1517</b> | EB2    | <i>ZRSR2</i>  | 48  | c.1314_1315insAG<br>CCGG                                                                     | p.R448_R449insSer<br>Arg | COSM5762985        |
|             |        | <i>CUX1</i>   | 38  | c.1636A>C                                                                                    | p.Lys546Gln              | rs118010189        |
| <b>1528</b> | 5q-    | n.d.          | -   | -                                                                                            | -                        | -                  |
| <b>1573</b> | RS-SLD | <i>SF3B1</i>  | 26  | c.2098A>G                                                                                    | p.Lys700Glu              | rs559063155        |
| <b>1592</b> | EB2    | <i>ASXL1</i>  | 50  | c.4189G>A                                                                                    | p.Gly1397Ser             | COSM133033         |
|             |        | <i>EZH2</i>   | 49  | c.862G>A                                                                                     | p.Arg288Ter              | COSM1000721        |
|             |        | <i>TET2</i>   | 45  | c.3852_3854delCTT                                                                            | p.Phe1285del             | COSM2270963        |
|             |        | <i>RUNX1</i>  | 45  | c.1158_1159insG                                                                              | p.Ser388fsTer212         | NA                 |
|             |        | <i>PHF6</i>   | 45  | c.385C>T                                                                                     | p.Arg129Ter              | COSM4606367        |

|             |     |               |    |            |                    |             |
|-------------|-----|---------------|----|------------|--------------------|-------------|
| <b>1803</b> | EB2 | <i>DNMT3A</i> | 41 | c.1728delT | p.Lys577ArgfsTer74 | NA          |
| <b>1834</b> | EB1 | <i>SF3B1</i>  | 37 | c.1998G>C  | p.Lys666Asn        | rs377023736 |
|             |     | <i>RUNX1</i>  | 35 | c.278A>T   | p.Asp93Val         | NA          |
|             |     | <i>EZH2</i>   | 7  | c.875A>G   | p.Tyr292Cys        | NA          |

**SI 3.** Overall survival of MDS patients in the sequencing cohort stratified according to clinical variables. \*p < 0.05, \*\*p < 0.01.

| Variable                  | Cut-off                     | No. of patients | Median OS (mo) | Hazard ratio (A/B) | 95% confidence interval | p value  |
|---------------------------|-----------------------------|-----------------|----------------|--------------------|-------------------------|----------|
| <b>Age</b>                | A: < 70 years               | 17              | 29.9           | 1.486              | 0.595 to 3.711          | 0.418    |
|                           | B: ≥ 70 years               | 14              | 30.4           |                    |                         |          |
| <b>Gender</b>             | A: female                   | 11              | 37.8           | 0.669              | 0.268 to 1.669          | 0.393    |
|                           | B: male                     | 20              | 23.5           |                    |                         |          |
| <b>Diagnosis</b>          | A: early MDS                | 13              | 36.3           | 0.414              | 0.162 to 1.054          | 0.038 *  |
|                           | B: advanced MDS             | 18              | 20.1           |                    |                         |          |
| <b>IPSS-R category</b>    | A: (very) low               | 17              | 36.3           | 0.303              | 0.108 to 0.853          | 0.006 ** |
|                           | B: (very) high              | 12              | 16             |                    |                         |          |
| <b>IPSS-R karyotype</b>   | A: (very) good              | 18              | 29.9           | 0.409              | 0.140 to 1.195          | 0.046 *  |
|                           | B: int/(very) poor          | 10              | 20.1           |                    |                         |          |
| <b>Bone marrow blasts</b> | A: < 5%                     | 14              | 36.3           | 0.381              | 0.148 to 0.981          | 0.024 *  |
|                           | B: ≥ 5%                     | 17              | 20.1           |                    |                         |          |
| <b>Hemoglobin</b>         | A: < 100 g/L                | 18              | 20.6           | 2.065              | 0.837 to 5.095          | 0.108    |
|                           | B: ≥ 100 g/L                | 13              | 30.7           |                    |                         |          |
| <b>Neutrophils</b>        | A: < 0.8x10 <sup>9</sup> /L | 8               | 13.7           | 2.694              | 0.755 to 9.619          | 0.034 *  |
|                           | B: ≥ 0.8x10 <sup>9</sup> /L | 23              | 30.7           |                    |                         |          |
| <b>Platelets</b>          | A: < 100x10 <sup>9</sup> /L | 17              | 23.5           | 1.832              | 0.739 to 4.545          | 0.180    |
|                           | B: ≥ 100x10 <sup>9</sup> /L | 14              | 37.8           |                    |                         |          |

**SI 4. Characteristics of the validation cohort analyzed with ddPCR.** The data are presented as the mean and range for all continuous variables. n.a. - not analyzed.

|                                                                  |                  |
|------------------------------------------------------------------|------------------|
| <b>MDS</b>                                                       | <b>36</b>        |
| Age                                                              | 60 (29–81)       |
| Sex (male/female)                                                | 26/10            |
| Diagnosis<br>SLD/MLD/RS/5q-/EB1/EB2                              | 2/10/2/1/5/16    |
| IPSS-R category<br>very low/low/intermediate/high/very high/n.a. | 6/10/5/4/11      |
| Bone marrow blasts (%)                                           | 7.1 (0.2–19.8)   |
| White blood count (x10 <sup>9</sup> /L)                          | 3.8 (0.9–11.4)   |
| Hemoglobin (g/L)                                                 | 101 (59–138)     |
| Neutrophils (x10 <sup>9</sup> /L)                                | 1.8 (0.1–7.6)    |
| Platelets (x10 <sup>9</sup> /L)                                  | 126 (26–273)     |
| Cytogenetic features                                             |                  |
| normal karyotype                                                 | 16               |
| isolated del(5q)                                                 | 2                |
| complex                                                          | 9                |
| other                                                            | 9                |
| IPSS-R karyotype<br>very good/good/intermediate/poor/very poor   | 1/20/3/3/9       |
| Follow-up                                                        |                  |
| mean follow-up (months)                                          | 11 (0–77)        |
| Deceased, number of patients                                     | 17 (47%)         |
| mean time to death (months)                                      | 7 (1–23)         |
| <b>AML-MRC</b>                                                   | <b>7</b>         |
| Age                                                              | 68 (62–76)       |
| Sex (male/female)                                                | 5/2              |
| Bone marrow blasts (%)                                           | 36.3 (23.0–62.0) |
| White blood count (x10 <sup>9</sup> /L)                          | 2.2 (1.0–4.8)    |
| Hemoglobin (g/L)                                                 | 100 (85–127)     |
| Neutrophils (x10 <sup>9</sup> /L)                                | 0.8 (0.1–2.9)    |
| Platelets (x10 <sup>9</sup> /L)                                  | 91 (10–202)      |
| Cytogenetic features                                             |                  |
| normal karyotype                                                 | 2                |
| complex                                                          | 3                |
| other                                                            | 2                |
| <b>Healthy donors</b>                                            | <b>12</b>        |
| Age                                                              | 69 (58–77)       |
| Sex (male/female)                                                | 4/8              |

**SI 5. Characterization of the extracellular particles in plasma.** (A) Particle size (mean size with 10<sup>th</sup> and 90<sup>th</sup> percentiles) measured by nanoparticle tracking analysis (NTA). (B) NTA report of representative samples of total plasma from one healthy control and one MDS-EB2 patient. (C) RNA yield obtained from (a) 1 ml of total plasma and (b) EV fractions that were isolated from 1 ml of the plasma is plotted.

**A. Size of extracellular particles**

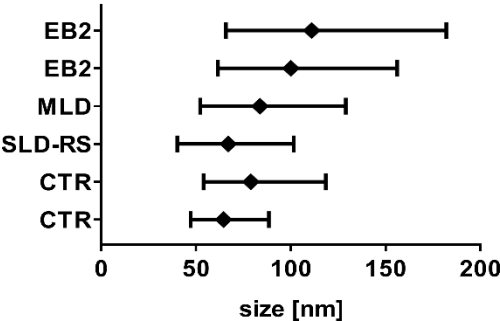

**B. NTA of selected samples**

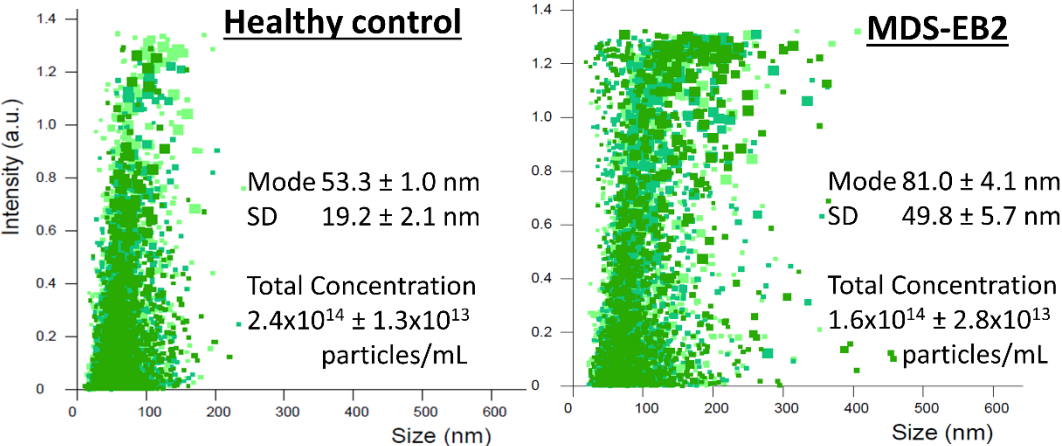

**C. Total RNA content**

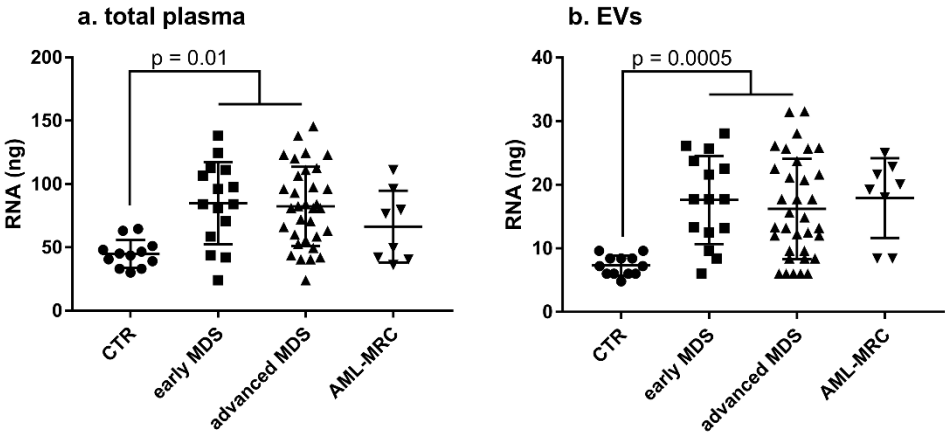





**SI 7.** Length of reads in relation to mapping rate.

| <b>Read length</b> | <b>Proportion of reads mapped to human genome</b> |
|--------------------|---------------------------------------------------|
| 15-19 bp           | 63%                                               |
| 20-22 bp           | 100%                                              |
| 23-30 bp           | 93%                                               |
| 31-70 bp           | 23%                                               |
| 71-85 bp           | 5%                                                |

**SI 8.** Taxonomy profile of reads mappable to nonhuman genomes. The proportion of the reads assigned to individual phyla is shown.

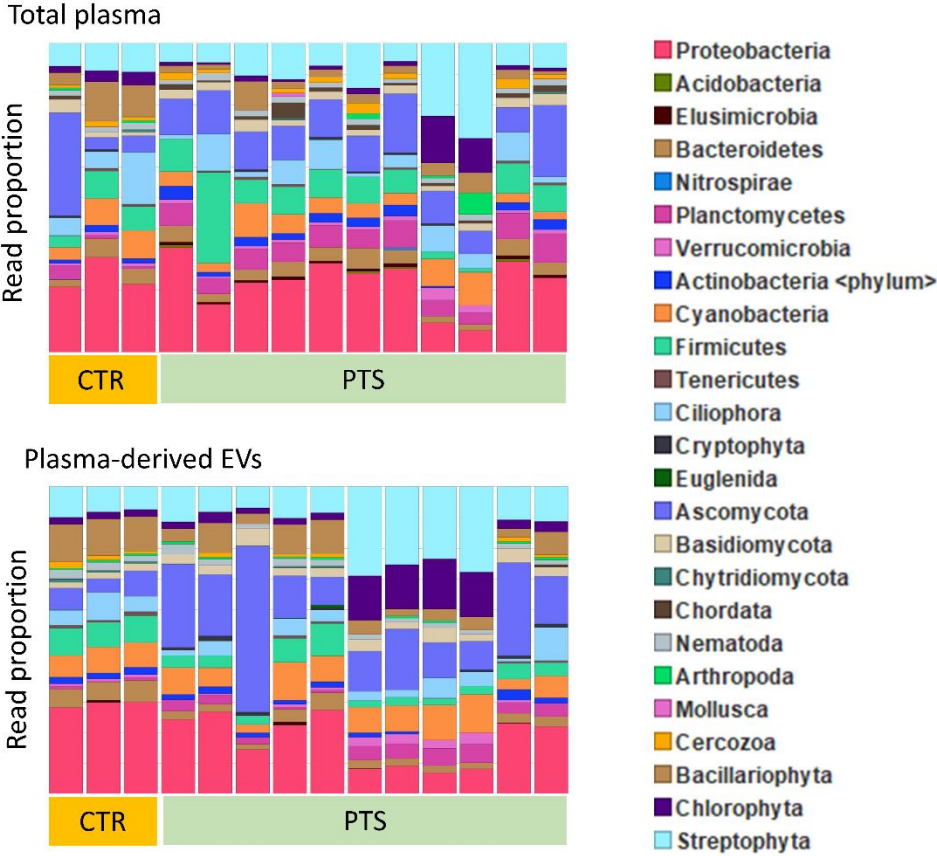

**SI 9.** Differentially expressed sncRNAs between paired samples of total plasma and EV fractions from MDS patients. Of the 419 significant sncRNAs ( $|\logFC| > 1$  and  $q < 0.05$ ), only the top 50 genes are listed. logCPM – binary logarithm of counts per million, logFC – binary logarithm of fold change, q-value – False Discovery Rate (FDR) adjusted p-value.

| gene                             | logCPM_PL | logCPM_EV | logFC | p-value  | q-value  |
|----------------------------------|-----------|-----------|-------|----------|----------|
| hsa_piR_001170/gb/DQ571526/Homo  | 5.24      | 0.25      | 6.76  | 9.64E-19 | 2.81E-15 |
| hsa_piR_020009/gb/DQ597484/Homo  | 6.05      | 0.74      | 6.39  | 7.71E-17 | 1.12E-13 |
| Homo_sapiens_chr2.trna19-GlyGCC  | 7.95      | 5.28      | 2.55  | 7.94E-16 | 7.70E-13 |
| hsa-miR-99b-5p                   | 11.07     | 8.70      | 2.25  | 1.70E-15 | 1.24E-12 |
| Homo_sapiens_chr16.trna25-GlyGCC | 10.20     | 7.23      | 2.78  | 2.64E-15 | 1.54E-12 |
| Homo_sapiens_chr1.trna68-GlyGCC  | 8.35      | 5.79      | 2.41  | 4.92E-15 | 2.05E-12 |
| Homo_sapiens_chr16.trna24-GlyGCC | 6.94      | 4.45      | 2.48  | 4.81E-15 | 2.05E-12 |
| Homo_sapiens_chr16.trna34-GlyCCC | 8.64      | 6.49      | 2.08  | 5.77E-14 | 2.10E-11 |
| Homo_sapiens_chr1.trna74-GluCTC  | 7.67      | 5.56      | 1.98  | 2.24E-13 | 7.24E-11 |
| hsa-miR-191-5p                   | 14.92     | 11.94     | 2.75  | 2.67E-13 | 7.52E-11 |
| Homo_sapiens_chr1.trna37-GlyGCC  | 6.83      | 4.57      | 2.15  | 2.84E-13 | 7.52E-11 |
| Ro-associated                    | 15.39     | 12.81     | 2.64  | 3.22E-13 | 7.81E-11 |
| hsa-miR-125a-5p                  | 13.37     | 11.57     | 1.87  | 3.91E-13 | 8.75E-11 |
| hsa-miR-103b                     | 11.99     | 9.33      | 2.42  | 4.22E-13 | 8.77E-11 |
| Homo_sapiens_chr1.trna39-GlyGCC  | 7.42      | 5.32      | 1.93  | 4.81E-13 | 9.33E-11 |
| Homo_sapiens_chr1.trna98-ValCAC  | 7.93      | 5.08      | 2.72  | 9.01E-13 | 1.64E-10 |
| hsa-miR-1301-3p                  | 7.84      | 5.84      | 1.73  | 9.65E-13 | 1.65E-10 |
| Homo_sapiens_chr1.trna116-GluCTC | 9.89      | 8.12      | 1.79  | 1.82E-12 | 2.94E-10 |
| Homo_sapiens_chr16.trna19-GlyGCC | 9.19      | 6.48      | 2.47  | 1.94E-12 | 2.97E-10 |
| hsa-miR-3135b                    | 8.01      | 6.01      | 1.77  | 2.34E-12 | 3.25E-10 |
| hsa_piR_016658/gb/DQ592931/Homo  | 12.31     | 9.57      | 2.71  | 2.33E-12 | 3.25E-10 |
| hsa-miR-744-5p                   | 11.75     | 9.79      | 1.88  | 2.69E-12 | 3.55E-10 |
| U95                              | 7.46      | 5.22      | 2.08  | 3.50E-12 | 4.42E-10 |
| hsa-miR-941                      | 8.53      | 6.94      | 1.59  | 4.09E-12 | 4.96E-10 |
| Homo_sapiens_chr1.trna77-GluCTC  | 7.66      | 5.92      | 1.65  | 4.44E-12 | 4.97E-10 |
| 5S                               | 10.20     | 8.11      | 1.96  | 4.39E-12 | 4.97E-10 |
| Homo_sapiens_chr15.trna11-GluTTC | 8.20      | 5.88      | 2.23  | 5.05E-12 | 5.07E-10 |
| Homo_sapiens_chr5.trna15-ValAAC  | 8.90      | 5.98      | 2.55  | 4.96E-12 | 5.07E-10 |
| Homo_sapiens_chr6.trna77-GluCTC  | 7.50      | 5.62      | 1.77  | 4.77E-12 | 5.07E-10 |
| Homo_sapiens_chr5.trna18-ValCAC  | 7.83      | 4.94      | 2.61  | 5.62E-12 | 5.46E-10 |
| Homo_sapiens_chr17.trna5-GlyGCC  | 8.19      | 6.07      | 2.06  | 5.96E-12 | 5.60E-10 |
| hsa-miR-103a-3p                  | 13.72     | 11.01     | 2.43  | 7.69E-12 | 6.40E-10 |
| hsa-miR-127-3p                   | 11.96     | 9.75      | 1.99  | 7.49E-12 | 6.40E-10 |
| Homo_sapiens_chr6.trna152-ValCAC | 8.85      | 5.55      | 2.55  | 7.60E-12 | 6.40E-10 |
| Homo_sapiens_chr6.trna87-GluCTC  | 7.24      | 5.22      | 1.93  | 7.37E-12 | 6.40E-10 |
| Homo_sapiens_chr1.trna59-GluCTC  | 7.20      | 4.92      | 2.16  | 1.11E-11 | 8.98E-10 |
| Homo_sapiens_chr2.trna27-GlyCCC  | 7.86      | 5.92      | 1.75  | 1.45E-11 | 1.14E-09 |
| hsa_piR_008114/gb/DQ581033/Homo  | 9.08      | 7.42      | 1.93  | 1.49E-11 | 1.14E-09 |

|                                 |       |       |      |          |          |
|---------------------------------|-------|-------|------|----------|----------|
| Homo_sapiens_chr21.trna2-GlyGCC | 7.93  | 5.55  | 2.14 | 1.59E-11 | 1.19E-09 |
| Homo_sapiens_chr1.trna41-GlyGCC | 8.09  | 6.13  | 1.88 | 2.27E-11 | 1.65E-09 |
| hsa-miR-671-3p                  | 7.37  | 5.77  | 1.42 | 2.36E-11 | 1.68E-09 |
| Homo_sapiens_chr1.trna71-GluCTC | 9.86  | 7.93  | 1.78 | 2.50E-11 | 1.73E-09 |
| hsa-miR-409-3p                  | 12.01 | 10.56 | 1.62 | 2.73E-11 | 1.85E-09 |
| Homo_sapiens_chr13.trna3-GluTTC | 8.37  | 6.37  | 1.93 | 3.68E-11 | 2.43E-09 |
| hsa_piR_016659/gb/DQ592932/Homo | 10.83 | 8.88  | 2.01 | 4.13E-11 | 2.67E-09 |
| hsa-miR-342-3p                  | 13.09 | 11.24 | 1.72 | 5.12E-11 | 3.24E-09 |
| Homo_sapiens_chr5.trna6-ValCAC  | 5.75  | 4.16  | 1.70 | 5.53E-11 | 3.42E-09 |
| hsa_piR_017716/gb/DQ594453/Homo | 7.86  | 5.24  | 2.17 | 1.04E-10 | 6.32E-09 |
| Homo_sapiens_chr15.trna2-LysCTT | 8.34  | 6.72  | 1.57 | 1.07E-10 | 6.33E-09 |
| Homo_sapiens_chr1.trna80-GluCTC | 9.76  | 7.48  | 1.98 | 1.20E-10 | 7.01E-09 |

**SI 10.** Differentially expressed sncRNAs between paired samples of total plasma and EV fractions from healthy controls ( $|\logFC| > 1$  and  $q < 0.05$ ).  $\logCPM$  – binary logarithm of counts per million,  $\logFC$  – binary logarithm of fold change,  $q$ -value – False FDR adjusted  $p$ -value.

| gene                                      | logCPM_PL | logCPM_EV | logFC | p-value  | q-value  |
|-------------------------------------------|-----------|-----------|-------|----------|----------|
| hsa_piR_020326/gb/DQ597916/Homo           | 6.20      | 2.62      | 3.10  | 1.37E-07 | 3.84E-04 |
| de novo miRNA_chr1:11968900..11968941:-   | 6.34      | 2.15      | 4.51  | 4.94E-07 | 6.95E-04 |
| hsa-miR-3649                              | 5.26      | 6.45      | -1.49 | 1.48E-06 | 1.22E-03 |
| hsa_piR_000765/gb/DQ570956/Homo           | 7.91      | 5.43      | 2.22  | 2.17E-06 | 1.22E-03 |
| hsa_piR_016659/gb/DQ592932/Homo           | 10.48     | 9.08      | 1.28  | 2.02E-06 | 1.22E-03 |
| Homo_sapiens_chr1.trna80-GluCTC           | 8.30      | 6.04      | 1.90  | 2.90E-06 | 1.36E-03 |
| hsa-miR-324-5p                            | 8.21      | 6.72      | 1.33  | 5.63E-06 | 2.26E-03 |
| hsa-miR-191-5p                            | 13.63     | 11.19     | 1.77  | 8.41E-06 | 2.72E-03 |
| Homo_sapiens_chr1.trna4-GlyCCC            | 7.68      | 4.67      | 2.15  | 8.71E-06 | 2.72E-03 |
| hsa-miR-643                               | 3.52      | 4.90      | -1.28 | 1.02E-05 | 2.86E-03 |
| hsa-miR-4508                              | 5.35      | 4.23      | 1.15  | 1.14E-05 | 2.93E-03 |
| de novo miRNA_chr17:79320004..79320044:-  | 7.96      | 3.90      | 4.82  | 1.73E-05 | 3.48E-03 |
| hsa_piR_016658/gb/DQ592931/Homo           | 10.37     | 8.99      | 1.40  | 1.69E-05 | 3.48E-03 |
| Homo_sapiens_chr1.trna71-GluCTC           | 8.68      | 7.03      | 1.46  | 1.59E-05 | 3.48E-03 |
| Homo_sapiens_chr16.trna19-GlyGCC          | 7.52      | 5.68      | 1.42  | 3.10E-05 | 5.41E-03 |
| Homo_sapiens_chr6.trna77-GluCTC           | 6.03      | 4.55      | 1.24  | 3.27E-05 | 5.41E-03 |
| hsa_piR_017716/gb/DQ594453/Homo           | 6.66      | 4.36      | 1.84  | 4.55E-05 | 6.39E-03 |
| Homo_sapiens_chr16.trna24-GlyGCC          | 5.24      | 3.91      | 1.36  | 4.47E-05 | 6.39E-03 |
| Ro-associated                             | 13.99     | 12.62     | 1.49  | 4.20E-05 | 6.39E-03 |
| hsa-miR-548v                              | 3.57      | 4.79      | -1.17 | 6.40E-05 | 8.18E-03 |
| hsa-miR-103b                              | 10.70     | 8.99      | 1.63  | 8.85E-05 | 9.21E-03 |
| hsa-miR-203a-3p                           | 6.99      | 8.39      | -1.60 | 8.18E-05 | 9.21E-03 |
| Homo_sapiens_chr1.trna68-GlyGCC           | 6.29      | 4.99      | 1.10  | 8.71E-05 | 9.21E-03 |
| 5S                                        | 9.15      | 7.99      | 1.10  | 8.31E-05 | 9.21E-03 |
| de novo miRNA_chr5:176932110..176932198:- | 4.24      | -0.31     | 4.79  | 1.05E-04 | 1.00E-02 |
| Homo_sapiens_chr1.trna77-GluCTC           | 6.43      | 5.02      | 1.18  | 1.07E-04 | 1.00E-02 |
| Homo_sapiens_chr16.trna34-GlyCCC          | 6.58      | 5.45      | 1.11  | 1.05E-04 | 1.00E-02 |
| Homo_sapiens_chr1.trna74-GluCTC           | 5.99      | 4.79      | 1.07  | 1.54E-04 | 1.38E-02 |
| Homo_sapiens_chr6.trna87-GluCTC           | 5.98      | 4.71      | 1.17  | 1.57E-04 | 1.38E-02 |
| hsa-miR-744-5p                            | 10.35     | 9.12      | 1.10  | 1.63E-04 | 1.39E-02 |
| de novo miRNA_chr7:143079637..143079686:+ | 5.77      | 3.72      | 2.03  | 1.77E-04 | 1.47E-02 |
| Homo_sapiens_chr16.trna25-GlyGCC          | 7.66      | 6.07      | 1.26  | 2.29E-04 | 1.84E-02 |
| Homo_sapiens_chr15.trna2-LysCTT           | 5.62      | 4.47      | 1.09  | 2.81E-04 | 2.19E-02 |
| de novo miRNA_chr22:20052702..20052764:+  | 4.29      | 0.50      | 4.17  | 2.90E-04 | 2.20E-02 |
| de novo miRNA_chr2:180934649..180934696:+ | 3.97      | 7.72      | -6.27 | 3.19E-04 | 2.36E-02 |
| Homo_sapiens_chr1.trna133-GlyCCC          | 4.10      | 2.00      | 2.09  | 3.79E-04 | 2.73E-02 |
| hsa-miR-454-3p                            | 7.83      | 5.41      | 1.83  | 4.22E-04 | 2.97E-02 |
| de novo miRNA_chr9:127107293..127107341:- | 6.15      | 1.24      | 6.11  | 5.02E-04 | 3.28E-02 |
| Homo_sapiens_chr1.trna59-GluCTC           | 5.67      | 4.40      | 1.13  | 4.94E-04 | 3.28E-02 |

|                                         |       |       |       |          |          |
|-----------------------------------------|-------|-------|-------|----------|----------|
| hsa-miR-103a-3p                         | 12.22 | 10.47 | 1.53  | 6.61E-04 | 3.95E-02 |
| de novo miRNA_chr6:26305715..26305784:- | 6.85  | 3.77  | 5.92  | 6.50E-04 | 3.95E-02 |
| hsa-miR-203b-5p                         | 5.43  | 6.46  | -1.06 | 7.84E-04 | 4.59E-02 |
| Homo_sapiens_chr21.trna2-GlyGCC         | 5.97  | 4.44  | 1.10  | 8.65E-04 | 4.77E-02 |
| Homo_sapiens_chr6.trna9-ValCAC          | 4.63  | 3.53  | 1.01  | 8.39E-04 | 4.77E-02 |

**SI 11.** Differentially expressed sncRNAs in total plasma samples from MDS patients vs. healthy controls. Of the 391 significant sncRNAs ( $|\logFC| > 1$  and  $q < 0.05$ ), only the top 50 genes are listed. logCPM – binary logarithm of counts per million, logFC – binary logarithm of fold change, q-value – FDR adjusted p-value.

| gene                                       | logCPM_MDS | logCPM_CTR | logFC | p-value  | q-value  |
|--------------------------------------------|------------|------------|-------|----------|----------|
| Homo_sapiens_chr6.trna152-ValCAC           | 8.77       | 5.13       | 3.71  | 7.33E-14 | 2.48E-10 |
| Homo_sapiens_chr15.trna11-GluTTC           | 8.13       | 5.75       | 2.43  | 1.84E-12 | 3.11E-09 |
| hsa-miR-4784                               | 7.22       | 5.22       | 2.04  | 4.82E-12 | 5.44E-09 |
| Homo_sapiens_chr1.trna62-LysTTT            | 6.76       | 4.17       | 2.64  | 1.44E-10 | 8.13E-08 |
| Homo_sapiens_chr1.trna98-ValCAC            | 7.84       | 5.12       | 2.82  | 1.30E-10 | 8.13E-08 |
| Homo_sapiens_chr5.trna15-ValAAC            | 8.81       | 6.28       | 2.59  | 1.36E-10 | 8.13E-08 |
| Homo_sapiens_chr2.trna27-GlyCCC            | 7.78       | 5.92       | 1.90  | 1.85E-10 | 8.97E-08 |
| hsa-miR-3135b                              | 7.93       | 5.72       | 2.23  | 1.68E-09 | 7.11E-07 |
| Homo_sapiens_chr1.trna41-GlyGCC            | 8.02       | 5.73       | 2.34  | 2.34E-09 | 8.82E-07 |
| Homo_sapiens_chr16.trna25-GlyGCC           | 10.12      | 7.75       | 2.38  | 2.89E-09 | 8.99E-07 |
| Homo_sapiens_chr16.trna34-GlyCCC           | 8.57       | 6.70       | 1.90  | 2.92E-09 | 8.99E-07 |
| Homo_sapiens_chr5.trna18-ValCAC            | 7.74       | 5.20       | 2.64  | 3.87E-09 | 1.09E-06 |
| Homo_sapiens_chr16.trna29-ProAGG           | 4.70       | 1.89       | 3.10  | 4.56E-09 | 1.19E-06 |
| Homo_sapiens_chr2.trna19-GlyGCC            | 7.87       | 5.71       | 2.21  | 5.40E-09 | 1.31E-06 |
| hsa_piR_020496/gb/DQ598175/Homo            | 4.90       | 2.30       | 2.84  | 5.82E-09 | 1.31E-06 |
| hsa-miR-34a-5p                             | 8.57       | 6.39       | 2.19  | 6.89E-09 | 1.43E-06 |
| de novo miRNA_chr10:105315004..105315059:- | 0.00       | 4.69       | -7.28 | 7.17E-09 | 1.43E-06 |
| hsa-miR-150-5p                             | 13.36      | 10.67      | 2.69  | 9.47E-09 | 1.69E-06 |
| hsa-miR-99b-3p                             | 7.37       | 4.98       | 2.44  | 9.36E-09 | 1.69E-06 |
| Homo_sapiens_chr18.trna4-LysCTT            | 8.35       | 5.24       | 3.14  | 1.75E-08 | 2.96E-06 |
| hsa-miR-615-5p                             | 3.80       | 4.87       | -1.13 | 2.21E-08 | 3.40E-06 |
| U104                                       | 10.16      | 7.16       | 3.01  | 2.14E-08 | 3.40E-06 |
| hsa-miR-99b-5p                             | 11.01      | 8.37       | 2.65  | 3.12E-08 | 4.33E-06 |
| hsa_piR_001170/gb/DQ571526/Homo            | 5.16       | 1.39       | 4.85  | 3.32E-08 | 4.33E-06 |
| Homo_sapiens_chr1.trna119-LysCTT           | 6.43       | 4.25       | 2.30  | 3.28E-08 | 4.33E-06 |
| U95                                        | 7.37       | 4.22       | 3.23  | 2.97E-08 | 4.33E-06 |
| Homo_sapiens_chr15.trna2-LysCTT            | 8.26       | 5.74       | 2.56  | 4.39E-08 | 5.51E-06 |
| hsa-miR-206                                | 5.70       | 7.24       | -1.58 | 5.06E-08 | 6.12E-06 |
| Homo_sapiens_chr1.trna37-GlyGCC            | 6.76       | 4.62       | 2.19  | 6.04E-08 | 7.06E-06 |
| Homo_sapiens_chr1.trna39-GlyGCC            | 7.34       | 5.12       | 2.26  | 6.74E-08 | 7.61E-06 |
| U50B                                       | 6.20       | 2.54       | 3.86  | 9.36E-08 | 1.02E-05 |
| U31                                        | 6.94       | 3.74       | 3.33  | 1.09E-07 | 1.15E-05 |
| Homo_sapiens_chr1.trna68-GlyGCC            | 8.27       | 6.39       | 1.90  | 1.50E-07 | 1.52E-05 |
| Homo_sapiens_chr19.trna2-GlyTCC            | 5.14       | 2.73       | 2.66  | 1.53E-07 | 1.52E-05 |
| Homo_sapiens_chr16.trna10-LysCTT           | 6.84       | 4.48       | 2.44  | 1.59E-07 | 1.54E-05 |
| hsa-miR-6126                               | 6.75       | 5.08       | 1.70  | 1.74E-07 | 1.64E-05 |
| de novo miRNA_chr17:42344334..42344386:+   | 0.00       | 5.92       | -8.56 | 1.86E-07 | 1.68E-05 |
| Homo_sapiens_chr19.trna13-ValCAC           | 8.61       | 6.96       | 1.69  | 1.88E-07 | 1.68E-05 |
| de novo miRNA_chr17:79320004..79320044:-   | 2.31       | 8.05       | -5.98 | 2.12E-07 | 1.84E-05 |



|                                          |      |      |       |          |          |
|------------------------------------------|------|------|-------|----------|----------|
| hsa-miR-4732-5p                          | 7.26 | 8.74 | -1.48 | 2.27E-07 | 1.92E-05 |
| U63                                      | 5.64 | 2.06 | 3.94  | 2.38E-07 | 1.96E-05 |
| Homo_sapiens_chr14.trna13-LysCTT         | 7.74 | 5.46 | 2.33  | 2.73E-07 | 2.15E-05 |
| Homo_sapiens_chr2.trna20-GluTTC          | 5.07 | 3.03 | 2.16  | 2.72E-07 | 2.15E-05 |
| Homo_sapiens_chr11.trna5-LysTTT          | 5.68 | 3.76 | 2.00  | 3.16E-07 | 2.43E-05 |
| Homo_sapiens_chr17.trna2-LysTTT          | 4.87 | 3.08 | 1.94  | 3.94E-07 | 2.97E-05 |
| de novo miRNA_chr16:89206351..89206427:+ | 0.00 | 6.57 | -9.23 | 4.26E-07 | 3.14E-05 |
| Homo_sapiens_chr16.trna9-ProAGG          | 6.81 | 4.48 | 2.43  | 4.56E-07 | 3.26E-05 |
| U20                                      | 7.14 | 4.55 | 2.68  | 4.61E-07 | 3.26E-05 |
| hsa_piR_020009/gb/DQ597484/Homo          | 5.97 | 2.72 | 3.67  | 4.80E-07 | 3.32E-05 |
| hsa-miR-491-5p                           | 6.57 | 5.34 | 1.20  | 5.00E-07 | 3.32E-05 |

**SI 12.** Differentially expressed sncRNAs in EV samples from MDS patients vs. healthy controls. Of the 219 significant sncRNAs ( $|\logFC| > 1$  and  $q < 0.05$ ), only the top 50 genes are listed. logCPM – binary logarithm of counts per million, logFC – binary logarithm of fold change, q-value – FDR adjusted p-value.

| gene                                       | logCPM_MDS | logCPM_CTR | logFC | p-value  | q-value  |
|--------------------------------------------|------------|------------|-------|----------|----------|
| hsa-miR-6786-5p                            | 3.92       | 5.23       | -1.36 | 1.68E-09 | 2.85E-06 |
| de novo miRNA_chr17:79320004..79320044:-   | 0.00       | 4.11       | -7.07 | 1.61E-09 | 2.85E-06 |
| de novo miRNA_chr6:26305715..26305784:-    | 0.00       | 3.99       | -6.95 | 1.44E-08 | 9.76E-06 |
| Homo_sapiens_chr18.trna4-LysCTT            | 7.26       | 4.14       | 3.17  | 1.39E-08 | 9.76E-06 |
| U31                                        | 6.42       | 2.97       | 3.57  | 1.21E-08 | 9.76E-06 |
| Homo_sapiens_chr11.trna14-LysTTT           | 5.99       | 4.06       | 1.99  | 1.93E-08 | 1.09E-05 |
| hsa-miR-4732-5p                            | 6.59       | 8.18       | -1.61 | 2.34E-08 | 1.13E-05 |
| Homo_sapiens_chr1.trna54-LysTTT            | 5.29       | 3.50       | 1.81  | 3.50E-07 | 1.19E-04 |
| hsa-miR-3194-3p                            | 4.93       | 6.45       | -1.51 | 7.62E-07 | 2.13E-04 |
| de novo miRNA_chr22:31284147..31284211:+   | 0.00       | 2.97       | -5.79 | 8.16E-07 | 2.13E-04 |
| U104                                       | 9.56       | 6.97       | 2.60  | 7.35E-07 | 2.13E-04 |
| de novo miRNA_chr2:43417763..43417825:-    | 0.00       | 3.30       | -6.16 | 2.27E-06 | 5.49E-04 |
| hsa-miR-5010-5p                            | 5.43       | 6.67       | -1.23 | 3.18E-06 | 7.12E-04 |
| hsa-miR-548v                               | 3.79       | 4.97       | -1.18 | 3.57E-06 | 7.12E-04 |
| U22                                        | 4.67       | 1.87       | 3.20  | 3.48E-06 | 7.12E-04 |
| de novo miRNA_chr1:12647947..12648008:-    | 0.00       | 2.64       | -5.42 | 4.51E-06 | 7.64E-04 |
| U20                                        | 6.93       | 4.60       | 2.38  | 4.28E-06 | 7.64E-04 |
| U3                                         | 7.32       | 5.33       | 2.02  | 4.41E-06 | 7.64E-04 |
| Homo_sapiens_chr15.trna2-LysCTT            | 6.69       | 4.66       | 2.06  | 5.38E-06 | 8.68E-04 |
| de novo miRNA_chr9:96064497..96064547:+    | 0.00       | 3.56       | -6.47 | 5.96E-06 | 8.79E-04 |
| de novo miRNA_chr9:96064529..96064607:+    | 0.00       | 3.56       | -6.47 | 5.96E-06 | 8.79E-04 |
| U26                                        | 8.35       | 6.12       | 2.25  | 6.66E-06 | 9.03E-04 |
| U50B                                       | 4.97       | 2.08       | 3.14  | 6.62E-06 | 9.03E-04 |
| hsa_piR_020496/gb/DQ598175/Homo            | 2.99       | 1.15       | 2.15  | 7.03E-06 | 9.09E-04 |
| U74                                        | 6.14       | 3.43       | 2.78  | 7.24E-06 | 9.09E-04 |
| de novo miRNA_chr10:105315004..105315059:- | 0.00       | 2.20       | -4.97 | 9.97E-06 | 1.21E-03 |
| hsa-miR-6784-3p                            | 5.05       | 6.93       | -1.89 | 1.30E-05 | 1.51E-03 |
| U24                                        | 4.77       | 2.31       | 2.63  | 1.79E-05 | 2.02E-03 |
| U25                                        | 4.57       | 1.96       | 2.86  | 2.86E-05 | 3.13E-03 |
| Homo_sapiens_chr11.trna5-LysTTT            | 5.02       | 3.51       | 1.55  | 3.52E-05 | 3.56E-03 |
| Homo_sapiens_chr16.trna29-ProAGG           | 3.50       | 1.67       | 2.10  | 3.44E-05 | 3.56E-03 |
| mgU2-19/30                                 | 5.22       | 3.52       | 1.83  | 3.57E-05 | 3.56E-03 |
| hsa-miR-379-5p                             | 9.13       | 6.70       | 2.44  | 3.90E-05 | 3.77E-03 |
| Homo_sapiens_chr7.trna16-CysGCA            | 0.93       | 5.10       | -5.04 | 4.17E-05 | 3.93E-03 |
| hsa-miR-6891-5p                            | 4.92       | 5.97       | -1.03 | 4.59E-05 | 4.10E-03 |
| Homo_sapiens_chr1.trna111-HisGTG           | 4.67       | 1.88       | 3.08  | 4.54E-05 | 4.10E-03 |
| Homo_sapiens_chr1.trna36-LeuCAG            | 5.57       | 3.74       | 1.87  | 4.91E-05 | 4.16E-03 |
| SNORD119                                   | 7.31       | 5.16       | 2.17  | 5.43E-05 | 4.49E-03 |
| Homo_sapiens_chr16.trna6-ProCGG            | 5.93       | 4.01       | 1.95  | 5.99E-05 | 4.62E-03 |

|                                           |       |      |       |          |          |
|-------------------------------------------|-------|------|-------|----------|----------|
| U33                                       | 7.36  | 5.79 | 1.59  | 5.98E-05 | 4.62E-03 |
| U3-3                                      | 6.86  | 5.24 | 1.65  | 5.78E-05 | 4.62E-03 |
| HBII-85-10                                | 3.65  | 1.78 | 2.18  | 6.27E-05 | 4.72E-03 |
| hsa-miR-323a-3p                           | 6.47  | 4.60 | 1.90  | 6.58E-05 | 4.75E-03 |
| mgh28S-2411                               | 5.17  | 2.87 | 2.43  | 6.48E-05 | 4.75E-03 |
| hsa-miR-34a-5p                            | 8.06  | 6.62 | 1.45  | 7.07E-05 | 4.83E-03 |
| Homo_sapiens_chr14.trna13-LysCTT          | 6.38  | 4.66 | 1.73  | 6.98E-05 | 4.83E-03 |
| U3-4                                      | 6.53  | 4.96 | 1.59  | 7.12E-05 | 4.83E-03 |
| hsa-miR-3944-3p                           | 4.96  | 3.54 | 1.44  | 7.35E-05 | 4.88E-03 |
| hsa-miR-423-3p                            | 10.04 | 8.24 | 1.81  | 7.54E-05 | 4.91E-03 |
| de novo miRNA_chr9:120405289..120405371:- | 7.57  | 0.00 | 10.59 | 7.82E-05 | 5.00E-03 |

**SI 13.** Numbers of deregulated circulating sncRNAs in (A) MDS patients vs. healthy controls, (B) MDS vs. AML-MRC patients, and (C) early vs. advanced subtypes of MDS. The numbers in the table show counts of significantly deregulated sncRNAs (increased/decreased in the 1<sup>st</sup> sample group compared to the 2<sup>nd</sup> sample group);  $|\logFC| > 1$  and  $q < 0.05$ ) in total plasma and plasma-derived EVs.

| Type of transcripts              | A<br>MDS vs. CTR |               | B<br>MDS vs. AML-MRC |             | C<br>early vs. adv. MDS |             |
|----------------------------------|------------------|---------------|----------------------|-------------|-------------------------|-------------|
|                                  | plasma           | EVs           | plasma               | EVs         | plasma                  | EVs         |
| <b>all annotated RNAs</b>        | <b>316/75</b>    | <b>179/40</b> | <b>1/8</b>           | <b>0/14</b> | <b>81/19</b>            | <b>34/9</b> |
| <b>annotated miRNAs</b>          | 112/36           | 65/18         | 0/3                  | 0/1         | 55/12                   | 24/7        |
| <b>de novo identified miRNAs</b> | 19/39            | 26/20         | 1/5                  | 0/10        | 12/4                    | 8/0         |
| <b>piRNAs</b>                    | 24/0             | 15/1          | 0/0                  | 0/1         | 7/1                     | 1/2         |
| <b>tRNAs</b>                     | 120/0            | 43/1          | 0/0                  | 0/2         | 5/1                     | 1/0         |
| <b>other annotated RNAs</b>      | 41/0             | 30/0          | 0/0                  | 0/0         | 2/1                     | 0/0         |

**SI 14.** Numbers of sncRNAs differentially represented ( $|\log_{2}FC| > 1$  and  $q < 0.05$ ) between A) MDS and healthy controls and B) early and advanced subtypes of MDS and their overlaps in the two types of tested material (total plasma and plasma-derived EVs).

**A. MDS vs. controls**

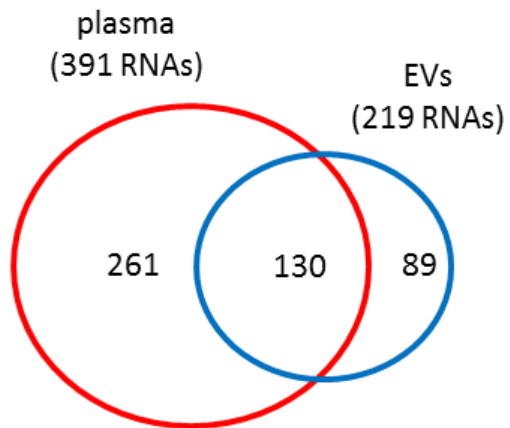

**B. early MDS vs. advanced MDS**

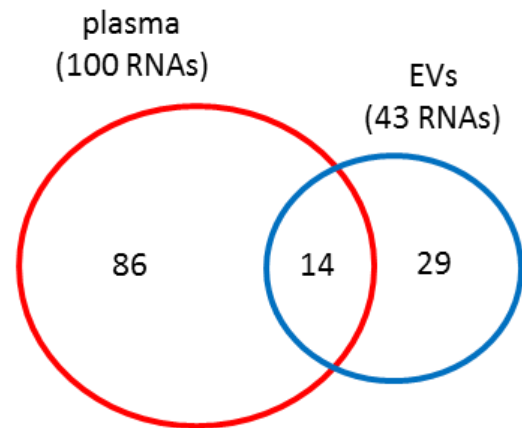

**SI 15.** Hematopoiesis-related miRNAs with different expression levels between MDS patients and controls. Statistical parameters were computed by the exact test in edgeR (\* $q < 0.05$ , \*\* $q < 0.01$ , \*\*\* $q < 0.001$ ). Total plasma - right parts of the graphs, plasma-derived EVs - left parts of the graphs, CTR - controls, MDS1 - early MDS (MDS-SLD, MDS-MLD, and MDS-5q-), MDS2 - advanced MDS (MDS-EB1 and MDS-EB2), AML - AML-MRC.

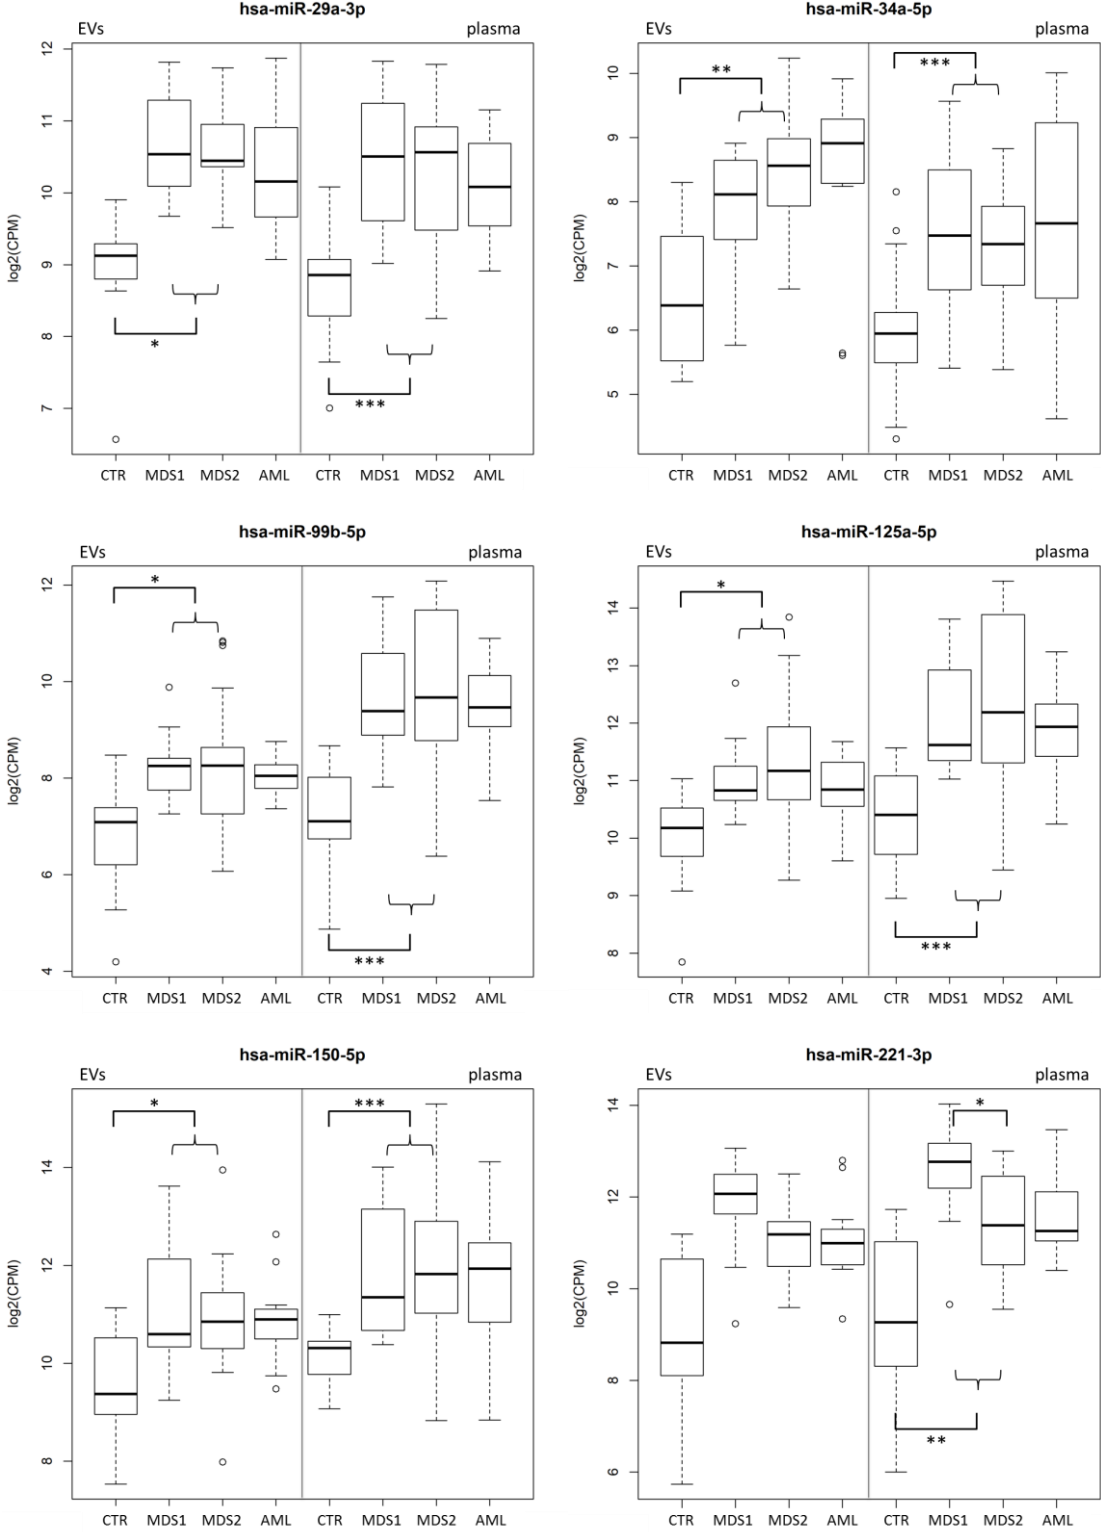

**SI 16.** Other types of sncRNAs with different expression levels between MDS patients and controls. Statistical parameters were computed by the exact test in edgeR (\* $q < 0.05$ , \*\* $q < 0.01$ , \*\*\* $q < 0.001$ ). Total plasma - right parts of the graphs, plasma-derived EVs - left parts of the graphs, CTR - controls, MDS1 - early MDS (MDS-SLD, MDS-MLD, and MDS-5q-), MDS2 - advanced MDS (MDS-EB1 and MDS-EB2), AML - AML-MRC.

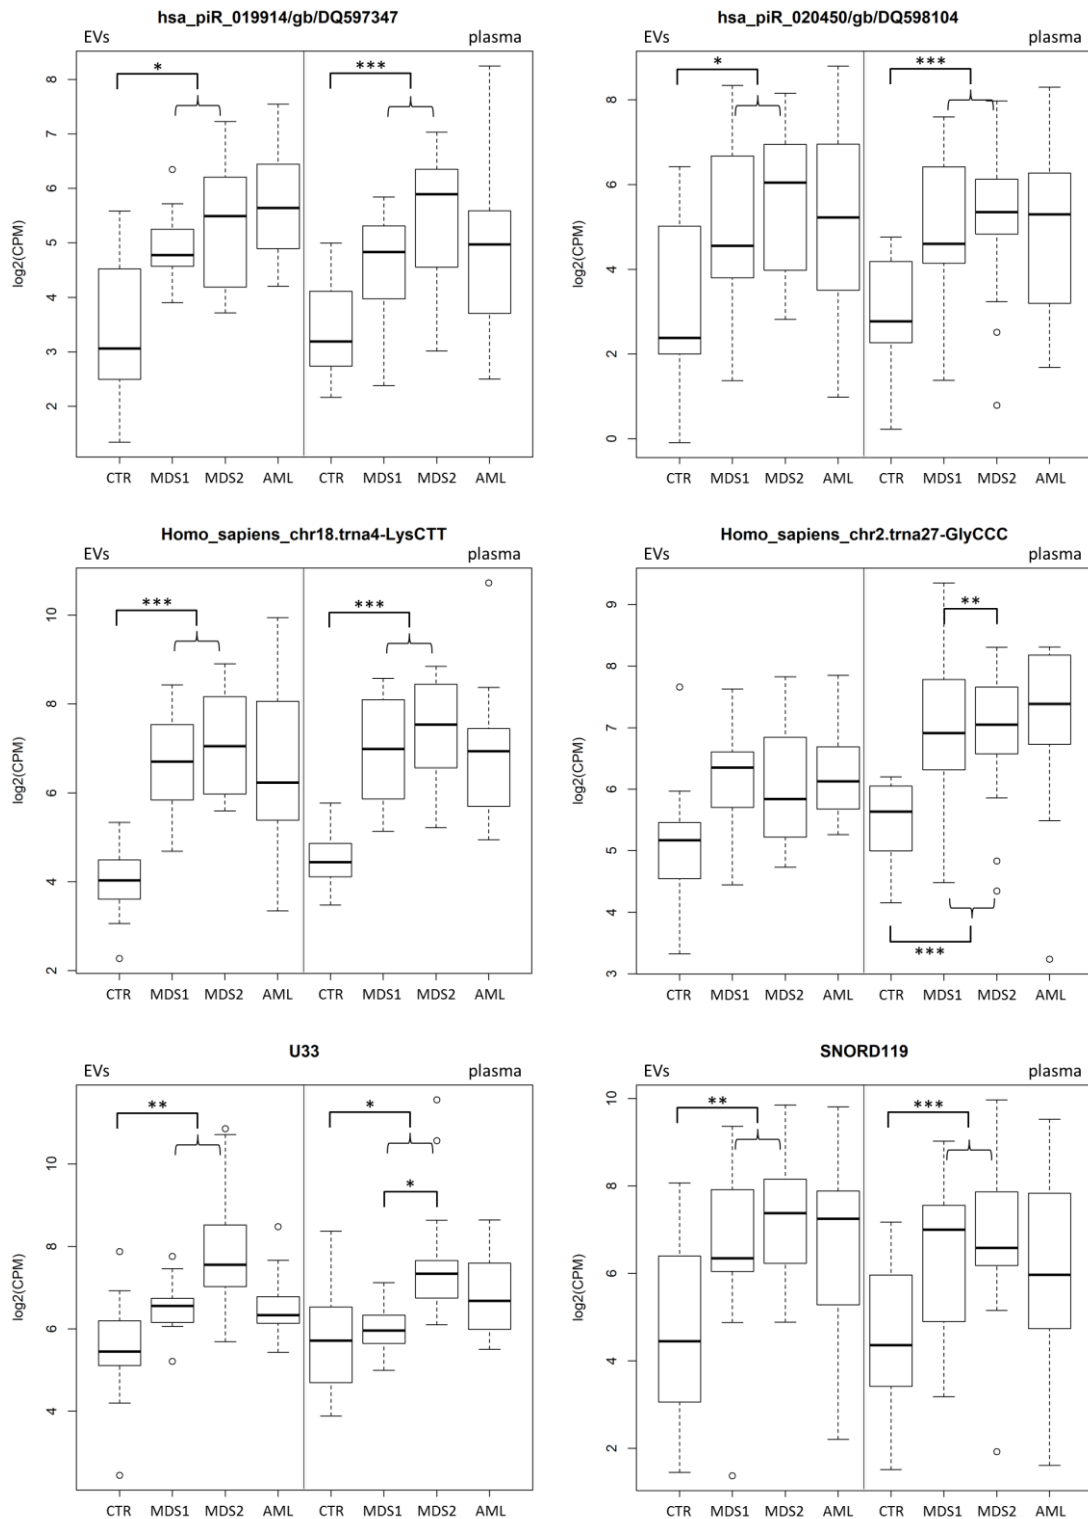

**SI 17.** Differentially expressed sncRNAs in total plasma samples from MDS vs. AML-MRC patients ( $|\logFC| > 1$  and  $q < 0.05$ ). logCPM – binary logarithm of counts per million, logFC – binary logarithm of fold change, q-value – FDR adjusted p-value.

| gene                                     | logCPM_MDS | logCPM_AML | logFC | p-value  | q-value  |
|------------------------------------------|------------|------------|-------|----------|----------|
| hsa-miR-125b-5p                          | 9.97       | 13.70      | -3.73 | 3.21E-17 | 1.18E-13 |
| hsa-miR-4324                             | 4.99       | 7.11       | -2.15 | 3.29E-09 | 6.07E-06 |
| de novo miRNA_chr3:53118888..53118934:+  | 6.49       | 0.00       | 9.16  | 4.94E-06 | 6.07E-03 |
| de novo miRNA_chr15:70482436..70482474:+ | 0.00       | 5.09       | -7.74 | 1.48E-05 | 1.36E-02 |
| hsa-miR-5694                             | 5.17       | 6.27       | -1.15 | 1.21E-04 | 4.96E-02 |
| de novo miRNA_chr17:42344334..42344386:+ | 0.00       | 3.05       | -5.58 | 7.97E-05 | 4.96E-02 |
| de novo miRNA_chr22:31284147..31284211:+ | 0.00       | 2.00       | -4.35 | 1.15E-04 | 4.96E-02 |
| de novo miRNA_chr7:74438675..74438732:+  | 0.00       | 2.55       | -5.01 | 1.16E-04 | 4.96E-02 |
| de novo miRNA_chr7:74807675..74807732:-  | 0.00       | 2.55       | -5.01 | 1.16E-04 | 4.96E-02 |



**SI 18.** Differentially expressed sncRNAs in EV samples from MDS vs. AML-MRC patients ( $|\logFC| > 1$  and  $q < 0.05$ ).  $\logCPM$  – binary logarithm of counts per million,  $\logFC$  – binary logarithm of fold change,  $q$ -value – FDR adjusted  $p$ -value.

| gene                                       | logCPM_MDS | logCPM_AML | logFC | p-value  | q-value  |
|--------------------------------------------|------------|------------|-------|----------|----------|
| de novo miRNA_chr13:62820841..62820876:-   | 0.00       | 3.06       | -6.16 | 7.80E-06 | 1.44E-02 |
| de novo miRNA_chr15:100437310..100437377:- | 0.00       | 3.59       | -6.74 | 6.47E-06 | 1.44E-02 |
| de novo miRNA_chr9:96064497..96064547:+    | 0.00       | 3.01       | -6.11 | 1.74E-05 | 1.60E-02 |
| de novo miRNA_chr9:96064529..96064607:+    | 0.00       | 3.01       | -6.11 | 1.74E-05 | 1.60E-02 |
| hsa-miR-513b-3p                            | 3.51       | 5.40       | -1.94 | 4.10E-05 | 2.58E-02 |
| Homo_sapiens_chr1.trna21-HisGTG            | 3.79       | 6.34       | -2.62 | 4.20E-05 | 2.58E-02 |
| de novo miRNA_chr19:1612215..1612261:-     | 0.00       | 2.02       | -4.95 | 5.43E-05 | 2.86E-02 |
| de novo miRNA_chr2:172967274..172967341:-  | 0.00       | 2.45       | -5.44 | 7.30E-05 | 3.36E-02 |
| de novo miRNA_chr2:172967321..172967395:-  | 0.00       | 2.45       | -5.45 | 1.08E-04 | 3.62E-02 |
| de novo miRNA_chr7:51845018..51845089:-    | 0.00       | 1.91       | -4.80 | 1.11E-04 | 3.62E-02 |
| hsa_piR_004307/gb/DQ575881/Homo            | 3.29       | 6.24       | -3.07 | 1.18E-04 | 3.62E-02 |
| Homo_sapiens_chr5.trna22-AspGTC            | 0.00       | 2.02       | -4.91 | 1.01E-04 | 3.62E-02 |
| de novo miRNA_chr4:70136062..70136142:-    | 0.00       | 1.55       | -4.28 | 1.52E-04 | 3.99E-02 |
| de novo miRNA_chr4:70245042..70245122:-    | 0.00       | 1.55       | -4.28 | 1.52E-04 | 3.99E-02 |

**SI 19.** Differentially expressed sncRNAs in total plasma samples from early MDS vs. advanced MDS. Of the 100 significant sncRNAs ( $|\logFC| > 1$  and  $q < 0.05$ ), only the top 50 genes are listed. logCPM – binary logarithm of counts per million, logFC – binary logarithm of fold change, q-value – FDR adjusted p-value.

| gene                                      | logCPM_ early MDS | logCPM_ advanced MDS | logFC | p-value  | q-value  |
|-------------------------------------------|-------------------|----------------------|-------|----------|----------|
| hsa-miR-409-5p                            | 6.83              | 4.99                 | 1.82  | 1.36E-08 | 4.86E-05 |
| hsa-miR-1908-5p                           | 8.06              | 6.43                 | 1.65  | 6.85E-08 | 1.19E-04 |
| hsa-miR-3156-5p                           | 2.69              | 6.31                 | -3.80 | 1.34E-07 | 1.19E-04 |
| Homo_sapiens_chr6.trna152-ValCAC          | 9.59              | 7.32                 | 2.27  | 1.22E-07 | 1.19E-04 |
| hsa-miR-382-3p                            | 7.51              | 5.62                 | 1.88  | 4.62E-07 | 3.29E-04 |
| hsa-miR-154-5p                            | 6.95              | 5.33                 | 1.60  | 1.53E-06 | 7.77E-04 |
| hsa-miR-181c-5p                           | 6.87              | 5.46                 | 1.41  | 1.36E-06 | 7.77E-04 |
| Homo_sapiens_chr7.trna5-CysGCA            | 3.66              | 4.99                 | -1.40 | 5.75E-06 | 2.56E-03 |
| hsa-miR-6852-5p                           | 7.58              | 5.76                 | 1.82  | 7.69E-06 | 2.74E-03 |
| hsa_piR_016658/gb/DQ592931/Homo           | 13.01             | 10.86                | 2.16  | 7.64E-06 | 2.74E-03 |
| hsa-miR-103b                              | 12.64             | 10.65                | 1.99  | 1.41E-05 | 3.42E-03 |
| hsa-miR-221-5p                            | 6.83              | 5.39                 | 1.44  | 1.24E-05 | 3.42E-03 |
| hsa-miR-3692-3p                           | 4.16              | 5.80                 | -1.68 | 1.29E-05 | 3.42E-03 |
| hsa-miR-494-3p                            | 8.34              | 6.65                 | 1.69  | 1.44E-05 | 3.42E-03 |
| hsa-miR-543                               | 5.81              | 4.04                 | 1.79  | 1.21E-05 | 3.42E-03 |
| de novo miRNA_chr3:4493117..4493175:+     | 5.69              | 0.00                 | 8.53  | 1.83E-05 | 4.08E-03 |
| hsa-miR-130b-5p                           | 6.29              | 5.18                 | 1.10  | 2.08E-05 | 4.12E-03 |
| de novo miRNA_chr22:32524271..32524358:+  | 4.33              | 0.00                 | 7.13  | 2.00E-05 | 4.12E-03 |
| hsa-miR-107                               | 12.53             | 10.86                | 1.68  | 2.31E-05 | 4.33E-03 |
| hsa-miR-374b-5p                           | 7.26              | 5.72                 | 1.54  | 3.51E-05 | 5.46E-03 |
| hsa-miR-4454                              | 8.29              | 6.64                 | 1.64  | 3.09E-05 | 5.46E-03 |
| hsa-miR-98-3p                             | 6.06              | 5.03                 | 1.02  | 3.53E-05 | 5.46E-03 |
| hsa_piR_008112/gb/DQ581031/Homo           | 14.11             | 12.42                | 1.69  | 3.33E-05 | 5.46E-03 |
| hsa-miR-374a-5p                           | 8.98              | 7.15                 | 1.83  | 4.34E-05 | 6.42E-03 |
| hsa-miR-6744-5p                           | 5.51              | 3.34                 | 2.30  | 4.51E-05 | 6.42E-03 |
| hsa-miR-1260b                             | 7.97              | 6.56                 | 1.42  | 6.21E-05 | 7.13E-03 |
| hsa-miR-3135b                             | 8.46              | 7.08                 | 1.38  | 5.64E-05 | 7.13E-03 |
| hsa-miR-490-3p                            | 7.06              | 5.46                 | 1.62  | 5.46E-05 | 7.13E-03 |
| hsa-miR-548z                              | 5.29              | 3.19                 | 2.15  | 5.54E-05 | 7.13E-03 |
| hsa-miR-6865-5p                           | 6.93              | 5.70                 | 1.23  | 6.02E-05 | 7.13E-03 |
| U82                                       | 3.54              | 0.00                 | 6.29  | 5.90E-05 | 7.13E-03 |
| de novo miRNA_chr3:127478544..127478604:- | 3.07              | 0.00                 | 5.78  | 6.74E-05 | 7.43E-03 |
| Homo_sapiens_chr2.trna27-GlyCCC           | 8.26              | 7.13                 | 1.13  | 6.89E-05 | 7.43E-03 |
| hsa-miR-662                               | 4.45              | 5.66                 | -1.27 | 8.34E-05 | 8.74E-03 |
| hsa-miR-181d-5p                           | 5.99              | 4.98                 | 1.03  | 1.11E-04 | 1.13E-02 |
| hsa-miR-7853-5p                           | 5.95              | 3.72                 | 2.28  | 1.16E-04 | 1.15E-02 |

|                                              |       |       |        |          |          |
|----------------------------------------------|-------|-------|--------|----------|----------|
| hsa-miR-485-5p                               | 8.62  | 6.82  | 1.81   | 1.20E-04 | 1.16E-02 |
| hsa-miR-30b-5p                               | 7.30  | 6.12  | 1.19   | 1.54E-04 | 1.32E-02 |
| hsa-miR-4433a-5p                             | 7.79  | 5.77  | 2.03   | 1.58E-04 | 1.32E-02 |
| hsa-miR-7-5p                                 | 9.80  | 8.33  | 1.46   | 1.55E-04 | 1.32E-02 |
| de novo<br>miRNA_chr1:228407332..228407406:+ | 0.00  | 4.86  | -7.68  | 1.53E-04 | 1.32E-02 |
| hsa_piR_008113/gb/DQ581032/Homo              | 14.00 | 12.55 | 1.45   | 1.59E-04 | 1.32E-02 |
| hsa-miR-766-3p                               | 6.37  | 5.13  | 1.26   | 1.78E-04 | 1.43E-02 |
| hsa_piR_001169/gb/DQ571525/Homo              | 2.65  | 0.00  | 5.31   | 1.85E-04 | 1.43E-02 |
| hsa-miR-302a-5p                              | 2.98  | 4.32  | -1.45  | 2.16E-04 | 1.64E-02 |
| hsa-miR-4286                                 | 7.90  | 6.38  | 1.52   | 2.26E-04 | 1.64E-02 |
| hsa-miR-485-3p                               | 10.81 | 8.93  | 1.88   | 2.21E-04 | 1.64E-02 |
| de novo<br>miRNA_chr12:22183350..22183415:+  | 0.00  | 7.32  | -10.18 | 2.35E-04 | 1.66E-02 |
| Ro-associated                                | 16.01 | 14.18 | 1.84   | 2.38E-04 | 1.66E-02 |
| Homo_sapiens_chr1.trna74-GluCTC              | 8.15  | 6.81  | 1.35   | 2.42E-04 | 1.66E-02 |

**SI 20.** Differentially expressed sncRNAs in EV samples from early MDS vs. advanced MDS ( $|\logFC| > 1$  and  $q < 0.05$ ).  $\logCPM$  – binary logarithm of counts per million,  $\logFC$  – binary logarithm of fold change,  $q$ -value – FDR adjusted  $p$ -value.

| gene                                       | logCPM_early MDS | logCPM_advanced MDS | logFC | p-value  | q-value  |
|--------------------------------------------|------------------|---------------------|-------|----------|----------|
| hsa-miR-1260a                              | 6.55             | 5.34                | 1.22  | 1.01E-04 | 1.92E-02 |
| hsa-miR-1260b                              | 7.30             | 5.76                | 1.55  | 1.31E-05 | 1.23E-02 |
| hsa-miR-1273c                              | 5.30             | 4.11                | 1.23  | 6.37E-04 | 4.83E-02 |
| hsa-miR-1299                               | 4.86             | 6.83                | -1.99 | 3.28E-04 | 3.08E-02 |
| hsa-miR-181c-3p                            | 5.82             | 4.62                | 1.22  | 1.89E-05 | 1.23E-02 |
| hsa-miR-1908-5p                            | 6.84             | 5.68                | 1.18  | 1.15E-04 | 1.92E-02 |
| hsa-miR-197-3p                             | 9.25             | 8.16                | 1.10  | 1.88E-04 | 2.16E-02 |
| hsa-miR-3151-5p                            | 6.83             | 5.24                | 1.61  | 2.43E-04 | 2.47E-02 |
| hsa-miR-323b-3p                            | 7.84             | 6.18                | 1.68  | 3.97E-04 | 3.54E-02 |
| hsa-miR-377-3p                             | 6.94             | 5.08                | 1.91  | 9.64E-05 | 1.92E-02 |
| hsa-miR-4275                               | 5.30             | 6.97                | -1.70 | 1.84E-04 | 2.16E-02 |
| hsa-miR-4286                               | 7.52             | 5.79                | 1.76  | 2.42E-05 | 1.23E-02 |
| hsa-miR-4307                               | 6.31             | 4.48                | 1.87  | 2.35E-04 | 2.47E-02 |
| hsa-miR-4433a-5p                           | 7.27             | 5.07                | 2.23  | 3.83E-05 | 1.52E-02 |
| hsa-miR-4433b-5p                           | 10.15            | 7.97                | 2.19  | 2.38E-04 | 2.47E-02 |
| hsa-miR-450b-5p                            | 5.61             | 4.35                | 1.32  | 5.07E-05 | 1.72E-02 |
| hsa-miR-4763-3p                            | 4.60             | 2.68                | 2.03  | 2.38E-05 | 1.23E-02 |
| hsa-miR-4772-5p                            | 5.79             | 3.47                | 2.41  | 5.30E-05 | 1.72E-02 |
| hsa-miR-485-3p                             | 9.62             | 7.67                | 1.95  | 1.32E-04 | 1.92E-02 |
| hsa-miR-5011-3p                            | 2.84             | 0.07                | 5.27  | 1.46E-05 | 1.23E-02 |
| hsa-miR-625-3p                             | 10.98            | 9.47                | 1.51  | 5.77E-04 | 4.52E-02 |
| hsa-miR-6754-3p                            | 4.87             | 3.45                | 1.46  | 4.94E-04 | 4.09E-02 |
| hsa-miR-6787-5p                            | 5.44             | 6.90                | -1.51 | 6.31E-05 | 1.74E-02 |
| hsa-miR-6788-3p                            | 4.98             | 6.55                | -1.61 | 3.04E-06 | 5.42E-03 |
| hsa-miR-6805-5p                            | 5.86             | 4.85                | 1.01  | 3.17E-05 | 1.41E-02 |
| hsa-miR-6832-3p                            | 3.89             | 5.48                | -1.66 | 2.43E-04 | 2.47E-02 |
| hsa-miR-6857-3p                            | 6.13             | 7.40                | -1.26 | 8.05E-05 | 1.79E-02 |
| hsa-miR-6862-5p                            | 5.02             | 3.68                | 1.36  | 3.05E-04 | 2.94E-02 |
| hsa-miR-6865-5p                            | 6.13             | 5.08                | 1.07  | 5.83E-04 | 4.52E-02 |
| hsa-miR-7853-5p                            | 7.58             | 4.46                | 3.16  | 1.62E-07 | 5.76E-04 |
| hsa-miR-7974                               | 3.90             | 5.28                | -1.55 | 1.37E-04 | 1.92E-02 |
| de novo miRNA_chr1:27878555..27878644:-    | 5.47             | 0.00                | 8.68  | 1.42E-04 | 1.92E-02 |
| de novo miRNA_chr1:33405583..33405644:-    | 4.00             | 0.00                | 7.16  | 4.38E-04 | 3.81E-02 |
| de novo miRNA_chr10:129068287..129068327:- | 4.94             | 0.00                | 8.14  | 1.46E-04 | 1.92E-02 |
| de novo miRNA_chr16:57923254..57923331:-   | 4.04             | 0.00                | 7.20  | 1.32E-04 | 1.92E-02 |
| de novo miRNA_chr16:72089401..72089448:-   | 4.59             | 0.00                | 7.78  | 6.78E-05 | 1.74E-02 |
| de novo miRNA_chr17:58205894..58205949:-   | 4.75             | 0.00                | 7.94  | 1.27E-04 | 1.92E-02 |

|                                              |      |      |       |          |          |
|----------------------------------------------|------|------|-------|----------|----------|
| de novo<br>miRNA_chr2:202526185..202526242:+ | 4.88 | 0.00 | 8.07  | 1.34E-04 | 1.92E-02 |
| de novo<br>miRNA_chr4:185095016..185095060:+ | 5.25 | 0.00 | 8.46  | 1.55E-04 | 1.97E-02 |
| hsa_piR_000805/gb/DQ571003/Homo              | 5.46 | 3.90 | 1.63  | 1.40E-04 | 1.92E-02 |
| hsa_piR_019420/gb/DQ596670/Homo              | 5.35 | 6.74 | -1.41 | 1.80E-04 | 2.16E-02 |
| hsa_piR_020499/gb/DQ598183/Homo              | 3.31 | 4.48 | -1.28 | 5.72E-04 | 4.52E-02 |
| Homo_sapiens_chr1.trna60-LeuTAA              | 2.70 | 0.00 | 5.73  | 7.25E-05 | 1.74E-02 |

**SI 21.** Selected miRNAs with different expression levels between early and advanced MDS. Statistical parameters were computed by the exact test in edgeR (\* $q < 0.05$ , \*\* $q < 0.01$ , \*\*\* $q < 0.001$ ). Total plasma - right parts of the graphs, plasma-derived EVs - left parts of the graphs, CTR - controls, MDS1 - early MDS (MDS-SLD, MDS-MLD, and MDS-5q-), MDS2 - advanced MDS (MDS-EB1 and MDS-EB2), AML - AML-MRC.

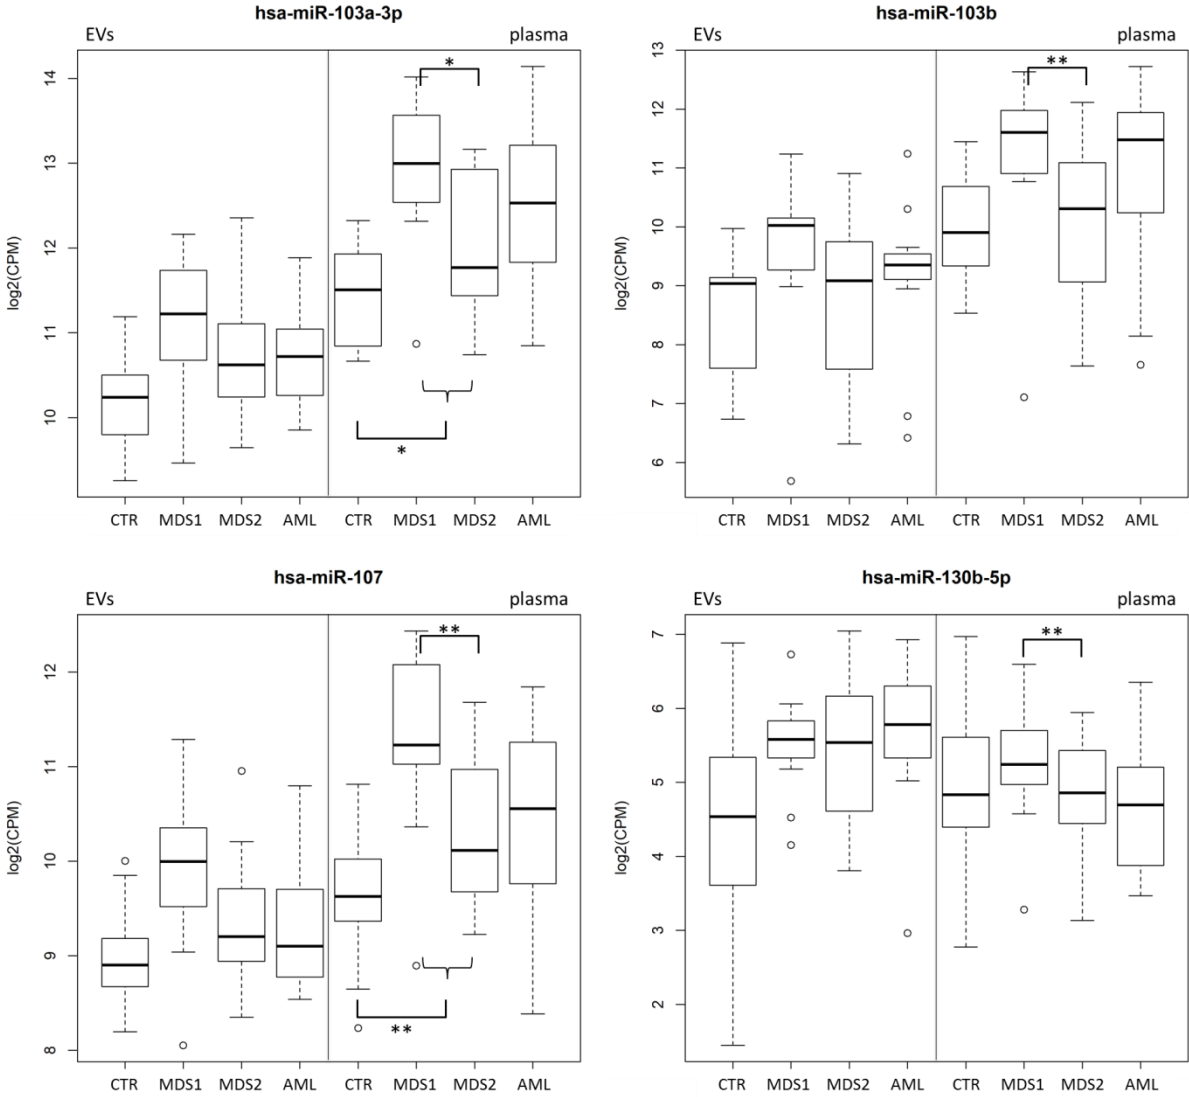

**SI 22.** miRNAs located within the 14q32 cluster with different expression levels in MDS patients. Statistical parameters were computed by the exact test in edgeR (\*q < 0.05, \*\*q < 0.01, \*\*\*q < 0.001). Total plasma - right parts of the graphs, plasma-derived EVs - left parts of the graphs, CTR - controls, MDS1 - early MDS (MDS-SLD, MDS-MLD, and MDS-5q-), MDS2 - advanced MDS (MDS-EB1 and MDS-EB2), AML - AML-MRC.

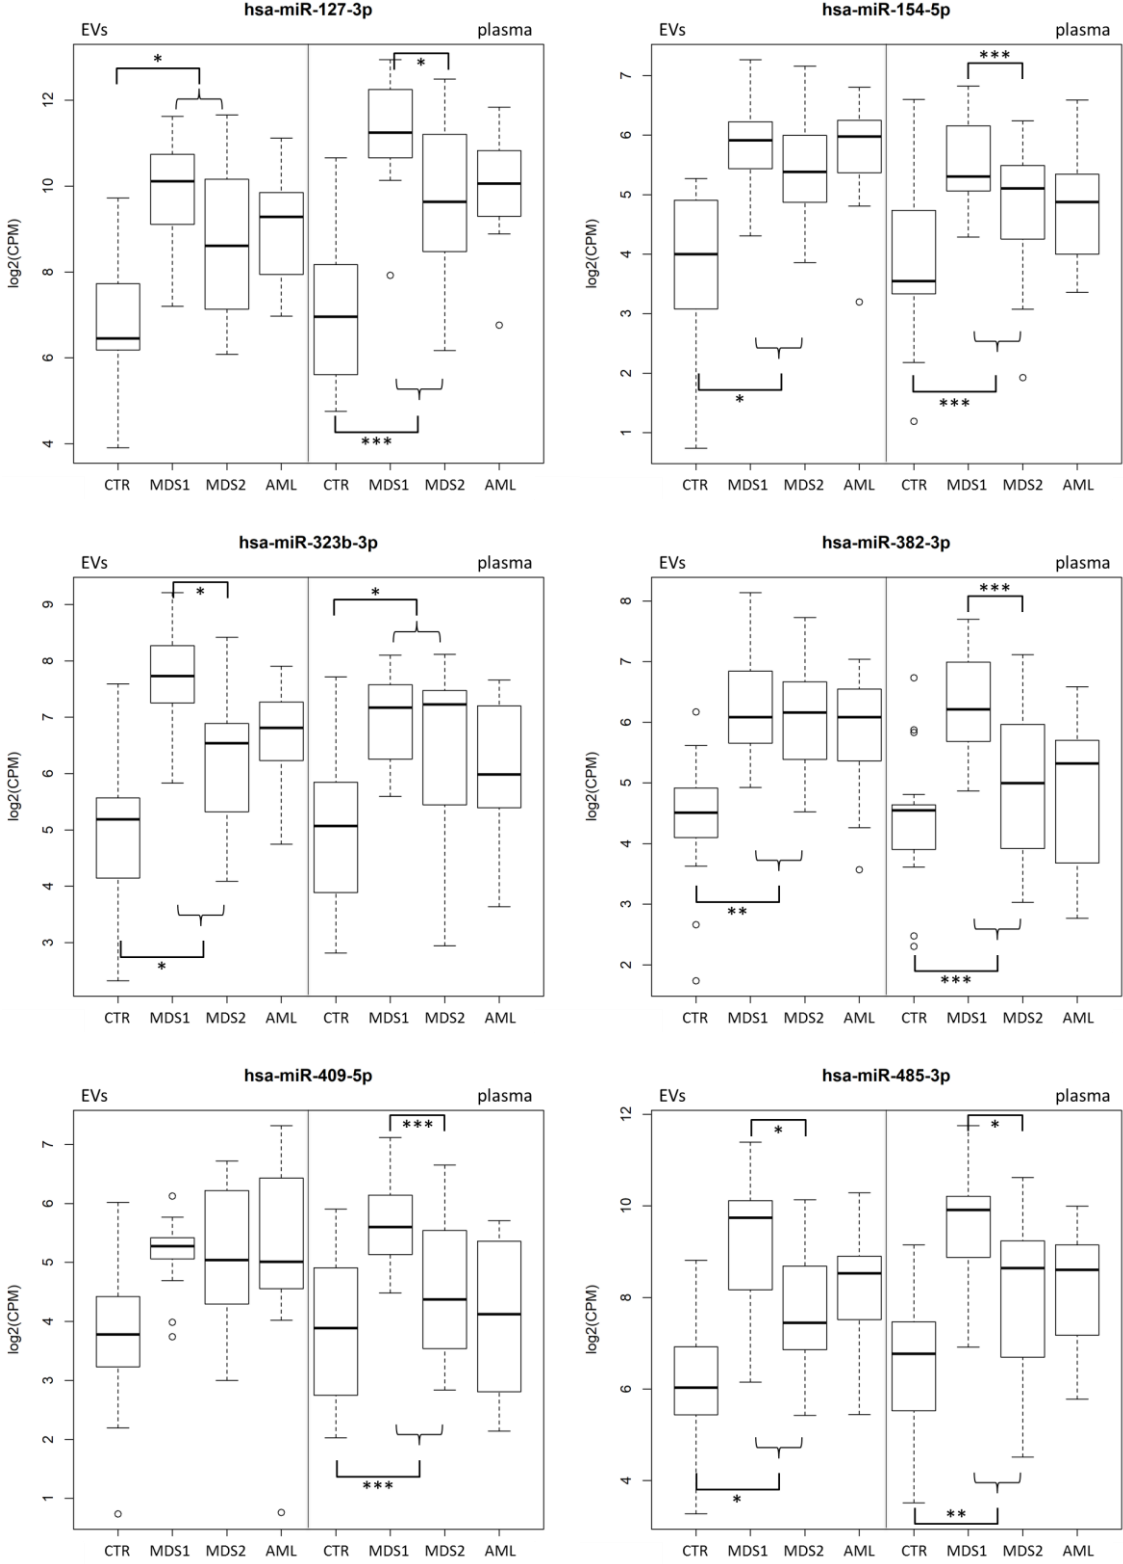

**SI 23.** Other types of sncRNAs with different expression levels between early and advanced MDS. Statistical parameters were computed by the exact test in edgeR (\*q < 0.05, \*\*q < 0.01, \*\*\*q < 0.001). Total plasma - right parts of the graphs, plasma-derived EVs - left parts of the graphs, CTR - controls, MDS1 - early MDS (MDS-SLD, MDS-MLD, and MDS-5q-), MDS2 - advanced MDS (MDS-EB1 and MDS-EB2), AML - AML-MRC.

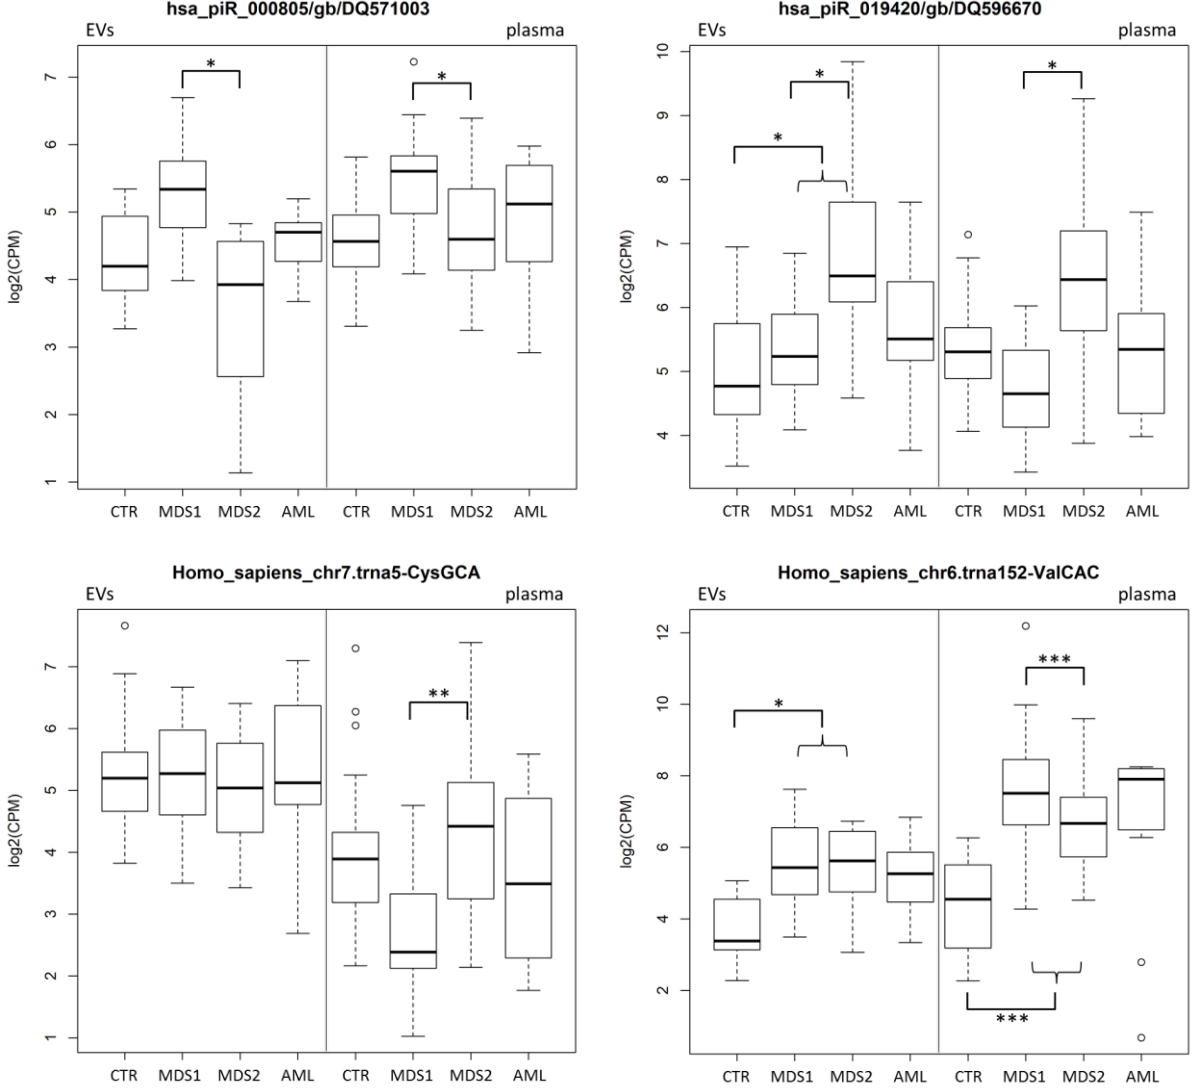



**SI 24.** Correlation of sncRNA levels measured in the two independent sample cohorts by the two different methods. In the testing cohort, the data were obtained using small RNA-seq (NGS) and in the validation cohort, by the ddPCR method. (A) The mean values of sncRNA levels (miR-16-5p, miR-34a-5p, miR-125a-5p, miR-125b-5p, miR-127-3p, miR-221-3p, and hsa\_piR\_001170/DQ571526) in individual sample groups (healthy controls, early MDS, advanced MDS, and AML-MRC) were plotted in the graph and Pearson correlation was calculated. (B) Detailed comparison of NGS and ddPCR results for miR-34a levels are shown for illustration.

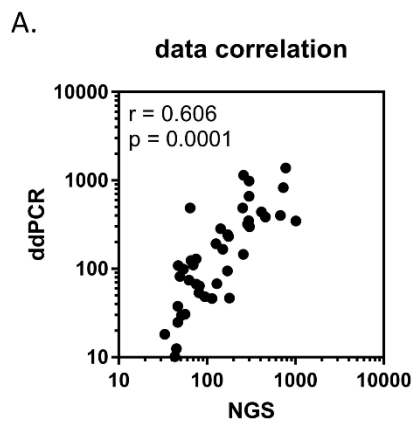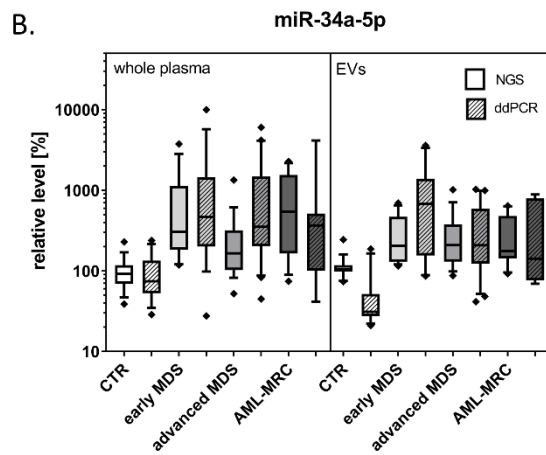

**SI 25.** Differential sncRNA levels with relation to somatic mutations of (A) the *DNMT3A* gene and (B) the *SF3B1* gene. Statistical parameters were computed by the exact test in edgeR (\* $p < 0.05$ , \*\* $p < 0.01$ , \*\*\* $p < 0.001$ ).

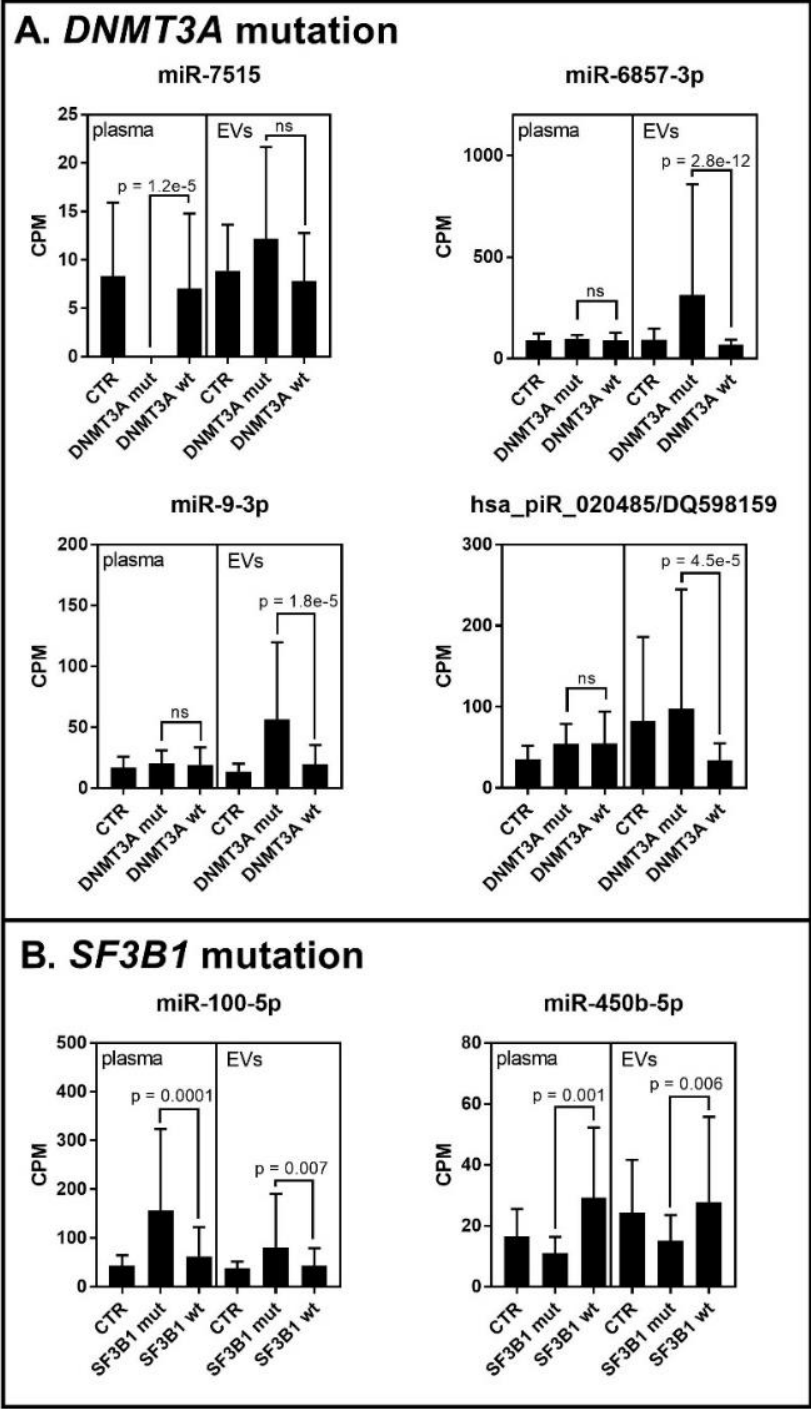

**SI 26.** SncRNAs significantly ( $p < 0.01$ ) deregulated in MDS patients with *DNMT3A* or *SF3B1* gene mutations.

| Somatic mutation |                    | SncRNA category | Upregulated sncRNAs                                                                                                                                                                                                          | Downregulated sncRNAs                                                                                                                                                                                                  |  |
|------------------|--------------------|-----------------|------------------------------------------------------------------------------------------------------------------------------------------------------------------------------------------------------------------------------|------------------------------------------------------------------------------------------------------------------------------------------------------------------------------------------------------------------------|--|
| <i>DNMT3A</i>    | total plasma       | miRNAs          | miR-34b-5p, miR-511-3p, miR-3652, miR-3667-3p, miR-4255, miR-4326, miR-4439, miR-4753-3p, miR-4765, miR-4668-5p, miR-6829-3p, miR-6832-5p                                                                                    | miR-98-3p, miR-133a-3p, miR-135a-5p, miR-340-3p, miR-374a-3p, miR-431-3p, miR-433-3p, miR-505-3p, miR-548ag, miR-708-3p, miR-758-3p, miR-1247-3p, miR-4518, miR-4528, miR-4659b-3p, miR-4781-5p, miR-6842-5p, miR-7515 |  |
|                  |                    | piRNAs          | -                                                                                                                                                                                                                            | hsa_piR_016658/DQ592931                                                                                                                                                                                                |  |
|                  |                    | tRNAs           | -                                                                                                                                                                                                                            | chr6.trna120-AlaAGC, chr6.trna87-GluCTC, chr14.trna3-ProTGG                                                                                                                                                            |  |
|                  |                    | others          | -                                                                                                                                                                                                                            | -                                                                                                                                                                                                                      |  |
|                  | plasma-derived EVs | miRNAs          | miR-7-5p, miR-9-3p, miR-9-5p, miR-182-5p, miR-183-5p, miR-320c, miR-379-5p, miR-629-5p, miR-1299, miR-3190-5p, miR-4275, miR-4496, miR-4772-5p, miR-5584-3p, miR-6734-5p, miR-6744-5p, miR-6857-3p, miR-6873-3p, miR-7111-3p | miR-513a-5p, miR-887-5p                                                                                                                                                                                                |  |
|                  |                    | piRNAs          | hsa_piR_018849/DQ595899, hsa_piR_019420/DQ596670, hsa_piR_019443/DQ596699, hsa_piR_020485/DQ598159                                                                                                                           | -                                                                                                                                                                                                                      |  |
|                  |                    | tRNAs           | chr11.trna8-SerGCT                                                                                                                                                                                                           | -                                                                                                                                                                                                                      |  |
|                  |                    | others          | HBII-85-10, mgU2-19/30, U2, U3-2, U3-2B, U33                                                                                                                                                                                 | -                                                                                                                                                                                                                      |  |
|                  |                    |                 |                                                                                                                                                                                                                              |                                                                                                                                                                                                                        |  |
|                  |                    |                 |                                                                                                                                                                                                                              |                                                                                                                                                                                                                        |  |
| <i>SF3B1</i>     | total plasma       | miRNAs          | miR-99b-3p, miR-100-5p, miR-1299, miR-3653-5p, miR-4520-5p, miR-4663                                                                                                                                                         | miR-424-5p, miR-450b-5p, miR-542-3p, miR-562, miR-767-3p, miR-2052, miR-3692-3p, miR-4646-3p, miR-6744-5p, miR-6812-5p, miR-6828-3p, miR-7161-3p, miR-8054                                                             |  |
|                  |                    | piRNAs          | hsa_piR_016735/DQ593039                                                                                                                                                                                                      | -                                                                                                                                                                                                                      |  |
|                  |                    | tRNAs           | chr1.trna4-GlyCCC                                                                                                                                                                                                            | -                                                                                                                                                                                                                      |  |
|                  |                    | others          | 5S                                                                                                                                                                                                                           | -                                                                                                                                                                                                                      |  |
|                  | plasma-derived EVs | miRNAs          | miR-30c-1-3p, miR-100-5p, miR-181b-2-3p, miR-548-3p, miR-597-3p, miR-3155a, miR-6510-5p, miR-6745                                                                                                                            | miR-450b-5p, miR-744-3p, miR-6857-3p                                                                                                                                                                                   |  |
|                  |                    | piRNAs          | -                                                                                                                                                                                                                            | -                                                                                                                                                                                                                      |  |
|                  |                    | tRNAs           | chr19.trna14-PheGAA                                                                                                                                                                                                          | -                                                                                                                                                                                                                      |  |
|                  |                    | others          | U18B, U50                                                                                                                                                                                                                    | U2                                                                                                                                                                                                                     |  |
|                  |                    |                 |                                                                                                                                                                                                                              |                                                                                                                                                                                                                        |  |
|                  |                    |                 |                                                                                                                                                                                                                              |                                                                                                                                                                                                                        |  |

**SI 27.** A-to-I editing of miRNAs in MDS. (A) Total number of detected A-to-I editing events per sample. (B) Heatmap of the most edited miRNAs. Only the miRNAs edited in  $\geq 10$  samples with editing  $\geq 5\%$  are shown. The black-and-white color scale indicates the level of editing (white – nonedited). (C) Characteristics of the most edited miRNAs. The table summarizes the position of the edited nucleotide in a miRNA, the number of samples with detected editing (out of 118 samples), and the maximal level of detected editing within these samples. (D) Differential editing of miR-411-5p and miR-376c-3p in samples from MDS patients compared to those of healthy controls and AML-MRC patients. eMDS – early MDS, aMDS – advanced MDS, Student’s t-test: \* $p < 0.05$ , \*\* $p < 0.01$ , \*\*\* $p < 0.001$ .

**A. Total number of editing events**

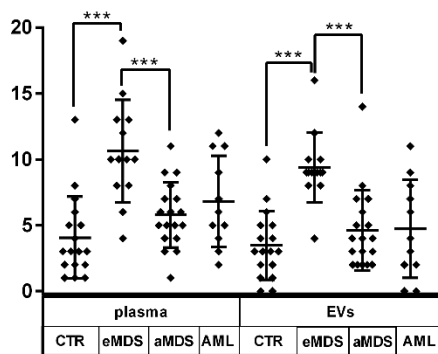

**B. The most edited miRNAs**

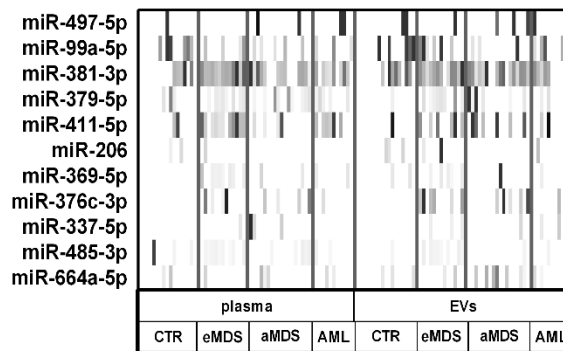

**C. Characteristics of the most edited miRNAs**

| MiRNA       | Edited nucleotide | No. of samples with editing | Maximal level of editing |
|-------------|-------------------|-----------------------------|--------------------------|
| miR-497-5p  | 2                 | 12                          | 42%                      |
| miR-99a-5p  | 1                 | 36                          | 36%                      |
| miR-381-3p  | 4                 | 79                          | 23%                      |
| miR-379-5p  | 5                 | 42                          | 20%                      |
| miR-411-5p  | 5                 | 38                          | 17%                      |
| miR-206     | 4                 | 10                          | 14%                      |
| miR-369-5p  | 3                 | 21                          | 13%                      |
| miR-376c-3p | 6                 | 21                          | 12%                      |
| miR-337-5p  | 3                 | 10                          | 8%                       |
| miR-485-3p  | 4                 | 30                          | 8%                       |
| miR-664a-5p | 8                 | 24                          | 5%                       |

**D. MiRNAs differentially edited in MDS**

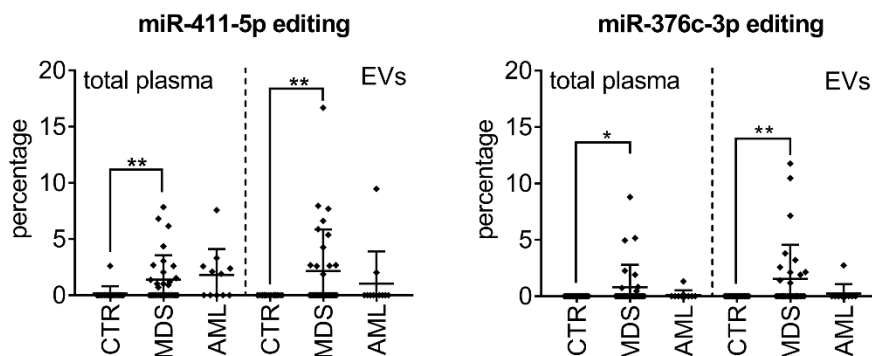

**SI 28.** List of sncRNAs significantly associated with OS in total plasma (univariate analysis  $p < 0.05$ ). Only the top 50 genes are listed.

| No. | sncRNA                     | Univariate p-value | Permutation p-value | Hazard Ratio |
|-----|----------------------------|--------------------|---------------------|--------------|
| 1   | miR-1260b                  | 0.0007295          | 6e-04               | 0.441        |
| 2   | miR-3191-3p                | 0.000914           | 9e-04               | 0.338        |
| 3   | miR-328-3p                 | 0.000929           | 8e-04               | 0.474        |
| 4   | miR-34c-3p                 | 0.001309           | 0.0011              | 6.643        |
| 5   | miR-4433b-5p               | 0.0013757          | 0.001               | 0.689        |
| 6   | miR-2277-5p                | 0.0015207          | 0.0017              | 0.245        |
| 7   | miR-6832-5p                | 0.0016179          | 0.0012              | 3.061        |
| 8   | miR-1260a                  | 0.001669           | 9e-04               | 0.484        |
| 9   | miR-330-3p                 | 0.0026699          | 0.0024              | 0.365        |
| 10  | miR-1226-3p                | 0.0031767          | 0.0036              | 0.251        |
| 11  | miR-4433a-3p               | 0.0031964          | 0.0023              | 0.743        |
| 12  | miR-744-5p                 | 0.0039036          | 0.0043              | 0.524        |
| 13  | miR-6843-3p                | 0.0040049          | 0.0045              | 0.255        |
| 14  | miR-23c                    | 0.0040442          | 0.0044              | 0.487        |
| 15  | Ro-associated              | 0.004448           | 0.0037              | 0.614        |
| 16  | miR-4319                   | 0.0045858          | 0.0029              | 3.94         |
| 17  | miR-5047                   | 0.004815           | 0.0039              | 3.398        |
| 18  | miR-4286                   | 0.0053686          | 0.0053              | 0.586        |
| 19  | miR-1273h-3p               | 0.0056116          | 0.0056              | 0.516        |
| 20  | miR-5583-5p                | 0.005985           | 0.0055              | 2.235        |
| 21  | miR-671-3p                 | 0.0064734          | 0.0066              | 0.542        |
| 22  | miR-1301-3p                | 0.0067595          | 0.0066              | 0.576        |
| 23  | miR-511-3p                 | 0.006919           | 0.0053              | 1.815        |
| 24  | miR-4697-3p                | 0.0069679          | 0.006               | 7.18         |
| 25  | miR-4467                   | 0.006982           | 0.0095              | 0.399        |
| 26  | miR-6852-5p                | 0.0071556          | 0.0063              | 0.619        |
| 27  | miR-1908-5p                | 0.0071847          | 0.0067              | 0.487        |
| 28  | miR-429                    | 0.007196           | 0.0078              | 0.421        |
| 29  | ACA36B                     | 0.0073276          | 0.0077              | 0.571        |
| 30  | hsa_piR_020485/gb/DQ598159 | 0.0074482          | 0.0069              | 2.34         |
| 31  | miR-339-5p                 | 0.0075905          | 0.0082              | 0.654        |
| 32  | miR-6781-5p                | 0.0077951          | 0.0072              | 2.746        |
| 33  | miR-7-2-3p                 | 0.0082029          | 0.0076              | 2.016        |
| 34  | miR-30d-5p                 | 0.0087168          | 0.0091              | 0.506        |
| 35  | miR-200b-3p                | 0.0088046          | 0.0097              | 0.43         |
| 36  | miR-4446-3p                | 0.0091568          | 0.0079              | 0.516        |
| 37  | miR-6844                   | 0.0097256          | 0.0086              | 2.971        |
| 38  | miR-98-3p                  | 0.0098561          | 0.0097              | 0.514        |

| <b>No.</b> | <b>sncRNA</b>       | <b>Univariate<br/>p-value</b> | <b>Permutation<br/>p-value</b> | <b>Hazard<br/>Ratio</b> |
|------------|---------------------|-------------------------------|--------------------------------|-------------------------|
| 39         | miR-139-5p          | 0.009859                      | 0.0092                         | 0.501                   |
| 40         | miR-205-3p          | 0.0101743                     | 0.0095                         | 1.902                   |
| 41         | miR-6814-3p         | 0.0115089                     | 0.0127                         | 2.858                   |
| 42         | miR-28-3p           | 0.0116952                     | 0.0132                         | 0.637                   |
| 43         | miR-628-3p          | 0.0117599                     | 0.0142                         | 0.5                     |
| 44         | miR-151b/151a-5p    | 0.0120327                     | 0.0139                         | 0.609                   |
| 45         | miR-4740-3p         | 0.012111                      | 0.0131                         | 3.038                   |
| 46         | miR-4423-5p         | 0.0121473                     | 0.0123                         | 2.287                   |
| 47         | miR-7974            | 0.0121517                     | 0.0156                         | 1.858                   |
| 48         | chr6.trna126-LeuAAG | 0.0123017                     | 0.0126                         | 0.569                   |
| 49         | miR-766-3p          | 0.0123959                     | 0.0132                         | 0.433                   |
| 50         | miR-625-5p          | 0.0126746                     | 0.0132                         | 0.522                   |

**SI 29.** List of sncRNAs significantly associated with OS in the EV fraction (univariate analysis  $p < 0.05$ ). Only the top 50 genes are listed.

| No. | sncRNA                     | Univariate p-value | Permutation p-value | Hazard Ratio |
|-----|----------------------------|--------------------|---------------------|--------------|
| 1   | miR-1237-3p                | 1.73e-05           | < 1e-07             | 20.135       |
| 2   | U33                        | 0.0005899          | 6e-04               | 2.499        |
| 3   | miR-548av-5p/548k          | 0.0012609          | 0.001               | 0.217        |
| 4   | hsa_piR_019420/gb/DQ596670 | 0.0013097          | 0.001               | 2.235        |
| 5   | miR-4799-5p                | 0.0028959          | 0.0011              | 0.153        |
| 6   | miR-424-3p                 | 0.00313            | 0.005               | 4.886        |
| 7   | miR-5705                   | 0.0042035          | 0.0052              | 3.125        |
| 8   | miR-5707                   | 0.0042469          | 0.0025              | 0.319        |
| 9   | miR-148a-5p                | 0.0044003          | 0.0046              | 0.199        |
| 10  | miR-4689                   | 0.0054431          | 0.0059              | 3.015        |
| 11  | miR-4474-3p                | 0.005792           | 0.0085              | 3.55         |
| 12  | miR-3611                   | 0.0062224          | 0.0042              | 0.363        |
| 13  | miR-4433b-5p               | 0.0065335          | 0.0061              | 0.685        |
| 14  | miR-3945                   | 0.0072613          | 0.0085              | 3.082        |
| 15  | U3-2B                      | 0.0088581          | 0.0084              | 1.613        |
| 16  | miR-6872-3p                | 0.0102911          | 0.0094              | 0.429        |
| 17  | miR-767-5p                 | 0.0103127          | 0.0088              | 0.483        |
| 18  | miR-181c-5p                | 0.0108319          | 0.0166              | 0.479        |
| 19  | miR-3145-3p                | 0.0108857          | 0.013               | 0.485        |
| 20  | miR-6780b-3p               | 0.0110434          | 0.0159              | 2.959        |
| 21  | HBII-85-10                 | 0.0125239          | 0.01                | 1.997        |
| 22  | miR-4446-3p                | 0.0127126          | 0.0126              | 0.515        |
| 23  | miR-548ar-5p               | 0.0128565          | 0.0112              | 0.251        |
| 24  | chr11.trna8-SerGCT         | 0.0129431          | 0.012               | 2.1          |
| 25  | miR-6840-3p                | 0.0145525          | 0.0143              | 0.458        |
| 26  | Ro-associated              | 0.0146849          | 0.0144              | 0.637        |
| 27  | chr6.trna65-AlaAGC         | 0.0156566          | 0.0198              | 0.392        |
| 28  | miR-3145-5p                | 0.0157297          | 0.0125              | 0.403        |
| 29  | miR-1263                   | 0.0158345          | 0.0146              | 0.395        |
| 30  | miR-6767-5p                | 0.016836           | 0.0143              | 1.719        |
| 31  | miR-1306-3p                | 0.0168833          | 0.0175              | 0.289        |
| 32  | hsa_piR_020365/gb/DQ597975 | 0.0169372          | 0.0188              | 1.745        |
| 33  | U3-2                       | 0.0180341          | 0.0154              | 1.549        |
| 34  | miR-1273c                  | 0.0185835          | 0.0201              | 0.607        |
| 35  | miR-3674                   | 0.0188046          | 0.0182              | 0.5          |
| 36  | U3                         | 0.0189568          | 0.0214              | 1.536        |
| 37  | miR-6808-3p                | 0.0191047          | 0.0235              | 0.384        |
| 38  | miR-200b-3p                | 0.0192423          | 0.0183              | 0.357        |

| No. | sncRNA       | Univariate p-value | Permutation p-value | Hazard Ratio |
|-----|--------------|--------------------|---------------------|--------------|
| 39  | miR-6078     | 0.0199924          | 0.0202              | 2.401        |
| 40  | miR-939-5p   | 0.020072           | 0.0196              | 3.875        |
| 41  | miR-1282     | 0.0207642          | 0.0221              | 2.525        |
| 42  | let-7b-3p    | 0.0238514          | 0.027               | 1.891        |
| 43  | miR-6837-5p  | 0.0255722          | 0.0274              | 2.077        |
| 44  | miR-8080     | 0.0257791          | 0.0229              | 0.428        |
| 45  | miR-2276-5p  | 0.025936           | 0.0279              | 0.313        |
| 46  | miR-580-5p   | 0.0260879          | 0.0266              | 0.57         |
| 47  | miR-206      | 0.0265768          | 0.0298              | 1.602        |
| 48  | miR-4798-5p  | 0.0266794          | 0.0255              | 0.565        |
| 49  | miR-4433b-3p | 0.0275745          | 0.0267              | 0.478        |
| 50  | U3-4         | 0.0288776          | 0.031               | 1.553        |



**SI 30.** Kaplan-Meier curves for individual sncRNAs significantly associated with overall survival of MDS patients in samples of (A) total plasma and (B) plasma-derived EVs.

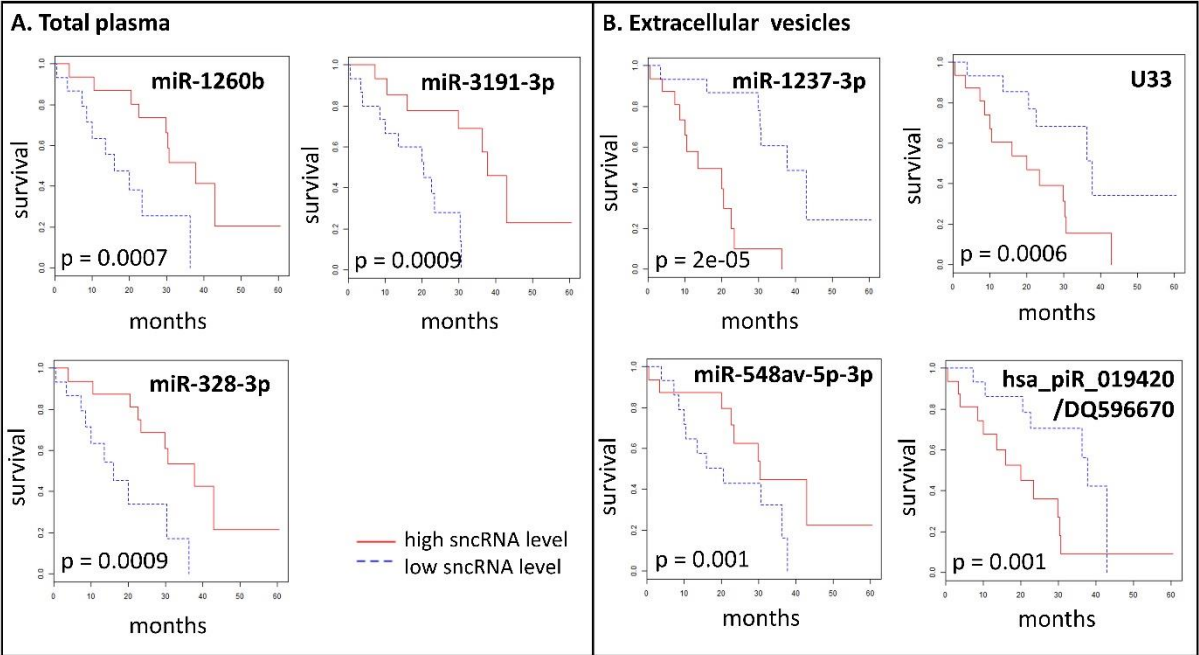

**SI 31.** Correlation of clinical variables with individual sncRNA levels and with combined scores for OS. The Pearson correlation coefficient is listed. \*\*\* p < 0.001, \*\* p < 0.01, \* p < 0.05.

|              |                               | age     | blasts   | hemoglobin | neutrophils | platelets     | karyotype |
|--------------|-------------------------------|---------|----------|------------|-------------|---------------|-----------|
| Total plasma | PL miR-1260b                  | -0.334  | -0.510** | 0.046      | 0.015       | 0.838***      | -0.225    |
|              | PL miR-3191-3p                | -0.253  | -0.199   | -0.125     | 0.061       | 0.337         | -0.300    |
|              | PL miR-328-3p                 | -0.453* | -0.487** | 0.239      | 0.029       | 0.826***      | -0.203    |
|              | combined score (total plasma) | 0.284   | 0.531**  | -0.088     | -0.053      | -<br>0.818*** | 0.218     |
| EVs          | EV U33                        | 0.090   | 0.365*   | -0.229     | 0.146       | -0.372*       | -0.093    |
|              | EV hsa_piR_019420/DQ596670    | 0.090   | 0.412*   | -0.119     | 0.140       | -0.473**      | -0.053    |
|              | EV miR-548av-5p               | 0.045   | -0.207   | 0.357*     | -0.114      | 0.270         | -0.204    |
|              | combined score (EVs)          | 0.168   | 0.413*   | -0.374*    | 0.066       | -0.490**      | 0.264     |

**SI 32.** Circulating sncRNAs deregulated in pretreatment AZA patients with respect to their response to the treatment according to differential expression analysis ( $|\logFC| > 1, q < 0.05$ ).

| SncRNAs<br>(logFC; q)                   | Total plasma                     |                                 | EV fraction                    |                                 |
|-----------------------------------------|----------------------------------|---------------------------------|--------------------------------|---------------------------------|
|                                         | responders vs.<br>progressors    | responders vs.<br>nonresponders | responders vs.<br>progressors  | responders vs.<br>nonresponders |
| <b>Upregulation<br/>in responders</b>   | miR-4774-3p<br>(5,61; 0.033)     | miR-762<br>(1.35; 0.039)        | miR-6857-3p<br>(1.64; 0.024)   | miR-6857-3p<br>(1.72; 0.00078)  |
|                                         |                                  |                                 |                                | miR-1299<br>(2.51; 0.040)       |
|                                         |                                  |                                 |                                | miR-183-5p<br>(2.59; 0.040)     |
| <b>Downregulation<br/>in responders</b> | miR-125b-5p<br>(-4.22; 1.23E-09) | miR-125b-5p<br>(-3.59; 0.0015)  | miR-513b-3p<br>(-3.49; 0.0017) | miR-513b-3p<br>(-2.89; 0.017)   |
|                                         | miR-4324<br>(-2.31; 0.023)       | miR-3156-5p<br>(-3.39; 0.039)   | miR-4275<br>(-2.53; 0.028)     | miR-6832-3p<br>(-2.21; 0.019)   |
|                                         |                                  | miR-3692-3p<br>(-1.77; 0.039)   |                                |                                 |

### **SI 33. SUPPLEMENTARY METHODS**

#### **Patients**

The main study cohort included peripheral blood (PB) plasma samples from 31 MDS and 11 AML-MRC patients analyzed by small RNA-seq. An independent validation cohort included 36 MDS and 7 AML-MRC patients analyzed by droplet digital PCR (ddPCR). The PB samples were obtained from patients during routine clinical assessment at the Institute of Hematology and Blood Transfusion and the First Department of Internal Medicine, General Faculty Hospital, Prague. Samples were collected from patients with primary MDS with no known history of previous malignancy, chemotherapy or radiation therapy. None of the patients had received drug therapy for their disease or hematopoietic stem cell transplantation (HSCT) prior to blood collection. After sample collection, several MDS/AML patients received azacytidine (AZA) therapy. AZA was administered at 75 mg/m<sup>2</sup>/day for 7 consecutive days every 28 days. The hematological evaluation of the response to the treatment was performed after cycle 4 according to the International Working Group (IWG) criteria for MDS [1] and AML [2]. As controls, blood plasma samples from 29 age-matched healthy donors (17 individuals analyzed by small RNA-seq and 12 individuals by ddPCR) with no adverse medical history were used. Written informed consent was obtained from all tested subjects in accordance with the approval from the Institutional Review Board.

#### **Separation of blood plasma**

PB was collected in EDTA tubes, and plasma was separated from the blood by centrifugation at 460 *g* for 10 min. The absence of hemolysis in plasma was confirmed spectrophotometrically by measuring the free hemoglobin (absorbance at 414 nm) and by evaluating the difference between miR-451 and miR-23a levels by qPCR using the StepOnePlus Real-Time PCR System (Thermo Fisher Scientific, Waltham, MA, USA) as described previously [3]. Plasma samples were further centrifuged at 12000 *g* at 4°C for 15 min to remove cell debris and stored at -80°C.

#### **TEM, NTA, and western blotting performance**

To confirm the presence and size of EVs, transmission electron microscopy (TEM), nanoparticle tracking analysis (NTA), and western blotting were performed. For TEM, EVs were visualized by negative staining. Parlodion-carbon-coated grids were floated on the top of a 5 µl drop of the sample for 5 min. Then, the grids were transferred on the top of a drop of 2% phosphotungstic acid (pH 7.4), stained for 2×1 min and dried. Photomicrographs were taken with a JEOL JEM-1011 electron microscope (JEOL, Peabody, MA, USA) operated at 80 kV. NTA was performed using a Malvern NanoSight NS300 instrument (Malvern Panalytical, Malvern, UK). Briefly, purified EVs were diluted 5 x 10<sup>3</sup> in PBS and tracked using NTA analysis software. Each sample was analyzed 3 times, and the counts were merged.

For western blotting, EVs and K562 total cell lysate (used as a positive or a negative control) were lysed in 200 µl of NaCl-HEPES + 0,15% Triton (Sigma-Aldrich, St. Louis, MO, USA) and incubated on ice for 20 min. Total protein concentration was quantified by the Bradford

protein assay (Bio-Rad, Hercules, CA, USA) and 30 µg of proteins were separated on 4 - 15% Mini-PROTEAN TGXTM gels (Bio-Rad) and transferred to a polyvinylidene difluoride (PVDF) membrane. The membrane was blocked with SuperBlock blocking buffer (Thermo Fisher Scientific, Waltham, MA, USA) and immunostained. The following primary antibodies were used: mouse anti-CD81 antibody (1:1000) (B11, sc-166029, Santa Cruz Biotechnology, Dallas, Texas, USA), rabbit anti-CD9 antibody (1:1000) (EXOAB Kit 1, System Biosciences, Palo Alto, CA, USA) and rabbit anti-calnexin (C5C9) antibody (1:1000) (2679, Cell Signaling Technology, Danvers, MA, USA). Secondary horseradish peroxidase-conjugated anti-rabbit (7074P2, Cell Signaling Technology) or anti-mouse (7076P2, Cell Signaling Technology) antibodies were used.

### **RNA extraction**

RNA was extracted from total plasma (200 µL) and from isolated EV fractions using the miRNeasy Serum/Plasma Kit (QIAGEN, Hilden, Germany) according to the manufacturer's protocol. The concentration of RNA was quantified with a Qubit 2.0 fluorometer (Thermo Fisher Scientific).

### **Small RNA-seq and data analysis**

All sequencing libraries were constructed from 5 µL of extracted plasma RNA and extravesicular RNA. The libraries were prepared, amplified and purified using a QIAseq miRNA Library Kit (QIAGEN) following the manufacturer's protocol. The concentration and size of the purified libraries were measured by Qubit 2.0 fluorometer and Agilent 4200 TapeStation (Agilent, Santa Clara, CA, USA), respectively. All libraries were adjusted to 4 nM, pooled together, and sequenced on a HiSeq 2500 sequencer (Illumina, San Diego, CA, USA) as single reads for 83 cycles.

After quality control of raw data using the FastQC tool [4], the sequences were processed using the QIAseq miRNA Primary Quantification pipeline (QIAGEN). Briefly, 3' adapter and low-quality bases were trimmed using Cutadapt [5], and the insert sequences and unique molecular indices (barcodes) were identified. Reads shorter than 16 nucleotides were discarded from the analysis. Sequences were then aligned using a sequential alignment strategy to map to different databases (perfect match to miRBase mature, miRbase hairpin, noncoding RNA, mRNA and other RNA, and finally a second mapping to miRBase mature, where up to two mismatches were tolerated) using Bowtie [6]. At each step, only unmapped sequences were passed to the next step. miRBase V21 was used for annotation of miRNAs, and piRNABank was used for piRNAs. All remaining unaligned sequences were mapped to the GRCh38 genome. *De novo* miRNAs were predicted using the miRdeep2 tool. Annotated read counts were subsequently processed in R statistical environment. Data normalization and subsequent statistical analyses were performed using the edgeR package [7]. Binary logarithms of fold changes (logFC) and q-values (False Discovery Rate (FDR) adjusted p-value) were generated as an output of edgeR package for differential expression analysis of the data. Hierarchical cluster analysis was performed using the pvclust package [8] with average

correlation. The remaining reads unmapped to the human genome were analyzed by the metagenome analyzer MEGAN [9] on some of the samples (11 patients and 3 healthy controls) using 50,000 randomly selected reads (the number was assessed as sufficient for the analysis based on a taxonomy rarefaction plot). Analysis of A-to-I editing was performed using the miRge2.0 tool [10].

### **Mutational screening and data analysis**

Mutational screening was performed as a part of routine clinical assessment using the TruSight Myeloid Sequencing Panel Kit (Illumina) containing 568 amplicons of 54 genes associated with myeloid malignancies. The amplicon library was constructed according to the manufacturer's recommendations. The libraries were 2x150 bp paired-end sequenced on a MiSeq instrument (Illumina), and the data were analyzed using NextGENe software (SoftGenetics, State College, PA, USA). The clinical significance of each variant was verified in several genomic databases (UCSC, COSMIC, ExAC, and PubMed). The arbitrary cut off was set at 3% of variant allele frequency (VAF).

### **Droplet digital PCR (ddPCR)**

The quantity of individual miRNAs was verified by ddPCR using a QX200 ddPCR system (Bio-Rad, Hercules, CA, USA). First, miRNAs were reverse-transcribed by a TaqMan MicroRNA Reverse Transcription Kit (Thermo Fisher Scientific) following the manufacturer's instructions. PCR reactions were prepared with ddPCR Supermix for Probes (Bio-Rad) and TaqMan miRNA assays (Thermo Fisher Scientific). Droplets were prepared using QX200 Automated Droplet Generator and (after PCR) counted on QX200 Droplet Reader with QuantaSoft software (all from Bio-Rad).

### **Statistical analyses**

Statistical analyses were performed using GraphPad Prism v7 software (La Jolla, CA, USA). Student's t-tests were used to compare continuous variables between different groups of samples. Correlation analyses were performed by computing Pearson correlation coefficients ( $r$ ). Differences were considered statistically significant at  $p < 0.05$ .

The overall survival (OS)-associated sncRNAs were identified by performing univariate Cox regression along with a permutation test using BRB-ArrayTools [11]. sncRNAs with permutation p-values  $< 0.001$ , which were computed based on 10,000 random permutations, were considered significantly associated with survival and included in a combined sncRNA signature. Then, a formula of survival risk score was constructed by including each of the selected sncRNAs, weighted by their estimated regression coefficients in the univariate Cox regression model. The leave-one-out cross-validation (LOOCV) method was employed to evaluate the accuracy of the score system. The prognostic index of a sample was computed by the formula  $\sum_i w_i x_i + 6.861$ , where  $w_i$  was the estimated regression coefficient and  $x_i$  was the logged level for the  $i$ -th gene. The patient cohort was then partitioned into two risk groups according to the survival risk score ( $>0$  for the high-risk group and  $\leq 0$  for the low-risk group).

Then, Kaplan–Meier curves and receiver operating characteristic (ROC) curves were plotted, and area under curve (AUC) values were calculated. Multivariate Cox regression analysis was performed to identify independent variables associated with patient survival.

The Recursive Feature Elimination (RFE) method implemented in Support Vector Machine (SVM) regression model was used to define sncRNA classifiers that discriminated AZA responders and nonresponders based on sncRNA pretreatment levels and interactions between them. Accuracy (Acc) and AUC were calculated to define the optimal number of features. Since the data sample was limited, the LOOCV method was employed to provide an unbiased evaluation of a model fit. The group of best classifiers was further tested and reduced by backward stepwise logistic regression algorithms using the maximum likelihood estimation (MLE) method. The resulting predictive formula was calculated by logistic regression using the KNIME platform and sag solver.

### **Pathway analysis**

Pathway analysis was performed based on significant differences in miRNA levels using DIANA-miRPath v3.0 [12]. Within the analysis, target prediction of miRNAs was computed using the DIANAmicroT-CDS, and the most significantly affected KEGG pathways were identified.

## SUPPLEMENTARY REFERENCES

- [1] Cheson BD, Greenberg PL, Bennett JM, Lowenberg B, Wijermans PW, Nimer SD et al. Clinical application and proposal for modification of the International Working Group (IWG) response criteria in myelodysplasia. *Blood* 2006;108:419-25.
- [2] Cheson BD, Bennett JM, Kopecky KJ, Büchner T, Willman CL, Estey EH et al. Revised recommendations of the International Working Group for Diagnosis, Standardization of Response Criteria, Treatment Outcomes, and Reporting Standards for Therapeutic Trials in Acute Myeloid Leukemia. *J Clin Oncol* 2003;21:4642-9.
- [3] Jaynish S Shah, Patsy S Soon, Deborah J Marsh. Comparison of Methodologies to Detect Low Levels of Hemolysis in Serum for Accurate Assessment of Serum microRNAs. *PLoS One* 2016;11:e0153200.
- [4] Wingett SW, Andrews S. FastQ Screen: A tool for multi-genome mapping and quality control. *F1000Res* 2018;7:1338.
- [5] Martin M. Cutadapt removes adapter sequences from high-throughput sequencing reads. *EMBnet.journal* 2011.
- [6] Langmead B, Trapnell C, Pop M, Salzberg SL. Ultrafast and memory-efficient alignment of short DNA sequences to the human genome. *Genome Biol* 2009;10:R25.
- [7] Robinson MD, McCarthy DJ, Smyth GK. edgeR: a Bioconductor package for differential expression analysis of digital gene expression data. *Bioinformatics* 2010;26:139-40.
- [8] Suzuki R, Shimodaira H. Pvcust: an R package for assessing the uncertainty in hierarchical clustering. *Bioinformatics* 2006;22:1540-2.
- [9] Huson DH, Beier S, Flade I, Górska A, El-Hadidi M, Mitra S et al. MEGAN Community Edition - Interactive Exploration and Analysis of Large-Scale Microbiome Sequencing Data. *PLoS Comput Biol* 2016;12:e1004957.
- [10] Lu Y, Baras AS, Halushka MK. miRge 2.0 for comprehensive analysis of microRNA sequencing data. *BMC Bioinformatics* 2018;19:275.
- [11] Ishwaran H, Kogalur UB, Gorodeski EZ, Minn AJ, Lauer MS. High-dimensional variable selection for survival data. *J AM STAT ASSOC* 2010;105:205-17.
- [12] Vlachos IS, Zagganas K, Paraskevopoulou MD, Georgakilas G, Karagkouni D, Vergoulis T et al. DIANA-miRPath v3.0: deciphering microRNA function with experimental support. *Nucleic acids research* 2015;43:W460-6.
